# Supplementary material for: β-barrels from short macrocyclic peptides
Source: Royal Society of Chemistry journal article supplement (doi:10.1039/d5cc06640a), 2026-01-01
Supplement: d5cc06640a1.pdf [file d5cc06640a1.pdf]

**Supporting information for:**  
***“Mini- $\beta$ -barrels From Short Macrocyclic Peptides”***

Viet Thuc Dang<sup>a</sup>, Michael W. Martynowycz<sup>b,c</sup>, Dan McElheny<sup>a</sup>, Andy I. Nguyen<sup>\*a</sup>

<sup>a</sup> Department of Chemistry, University of Illinois Chicago, Chicago, Illinois 60607, United States

<sup>b</sup> UB Hauptman-Woodward Institute (UB-HWI), University at Buffalo, Buffalo, NY 14203, United States

<sup>c</sup> Department of Structural Biology, Jacobs School of Medicine and Biomedical Sciences, University at Buffalo, Buffalo, NY 14203

\*Corresponding author. *E-mail:* andyn@uic.edu

**Table of Contents**

|                                                     |    |
|-----------------------------------------------------|----|
| I. General considerations .....                     | 2  |
| II. Synthesis and characterization .....            | 3  |
| Structure of reported peptides .....                | 3  |
| Resin loading determination .....                   | 5  |
| LC-MS data for reported peptides .....              | 11 |
| Nuclear magnetic resonance (NMR) spectroscopy ..... | 19 |
| Diffusion NMR methods and processing .....          | 27 |
| Circular dichroism spectroscopy .....               | 36 |
| 2D NMR spectroscopy .....                           | 38 |
| NMR structure determination and refinement .....    | 48 |
| Crystallization .....                               | 59 |
| X-ray crystallography .....                         | 60 |
| III. References .....                               | 63 |

## I. General considerations

Trifluoroacetic acid (TFA), triisopropylsilane (TIPS), *N,N'*-diisopropylcarbodiimide (DIC), Fmoc-L-Trp(Boc)-OH, Fmoc-His(Trt)-OH, Fmoc-L-Ser(tBu)-OH, Fmoc-L-Phe-OH, Fmoc-L-Ile-OH, Fmoc-Sar-OH, Fmoc-N-methyl-Ala-OH, *N* $\alpha$ -Boc-*N* $\delta$ -Fmoc-L-Orn-OH, Fmoc-L-His( $\pi$ -Me)-OH, ethyl(hydroxyimino) cyanoacetate (Oxyma), *N,N*-diisopropylethylamine (DIPEA), (1-cyano-2-ethoxy-2-oxoethylidenaminoxy)dimethylamino-morpholino-carbenium hexafluorophosphate (COMU), and 2-chlorotriyl chloride resin were purchased from Chem-Impex International Inc. Acetonitrile (MeCN) was purchased from Millipore Sigma. Dichloromethane (DCM) and 4-methyl-piperidine were purchased from Fisher. *N,N*-dimethylformamide (DMF), 4-(2-hydroxyethyl)-1-piperazineethanesulfonic acid (HEPES), and 2,3,4-trimethylpyridine (collidine) was purchased from Sigma-Aldrich.

## II. Synthesis and characterization

### *Structure of reported peptides*

Synthesized peptides were exposed to trifluoroacetic acid during the purification process. Masses used for the preparation of samples from lyophilized solid peptide account for the presence of these trifluoroacetate counterions based on the number of functional groups with  $pK_a$  values greater than that of trifluoroacetic acid. The adjusted mass and expected number of counterions are given below each structure.

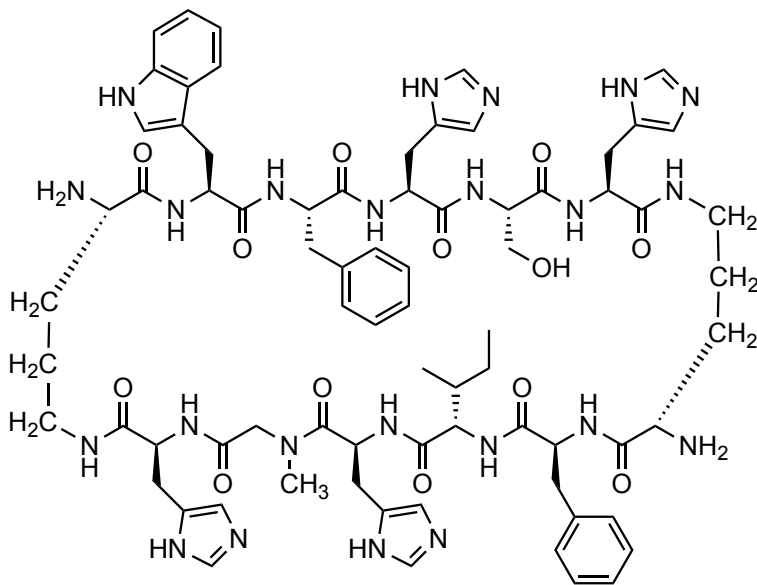

**MC4H**

MW: 1528.75  
MW+6TFA: 2212.89

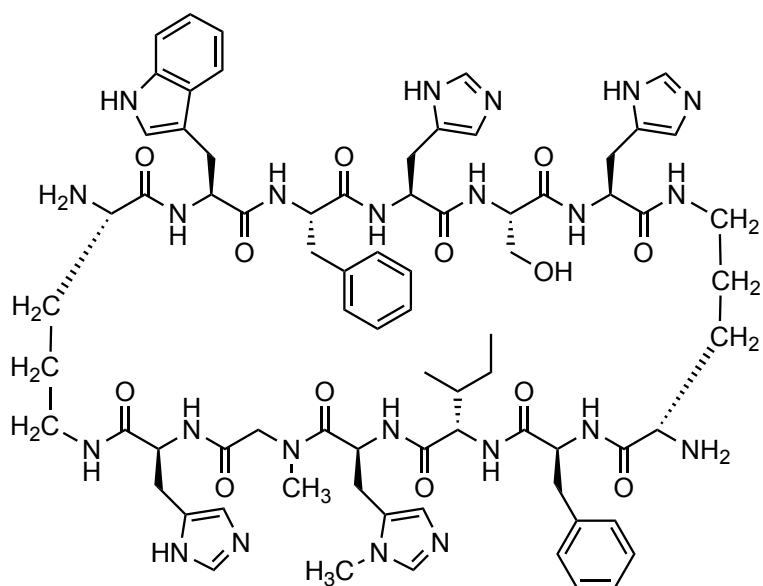

**MC4H-MeH**

MW: 1542.78  
MW+6TFA: 2226.92

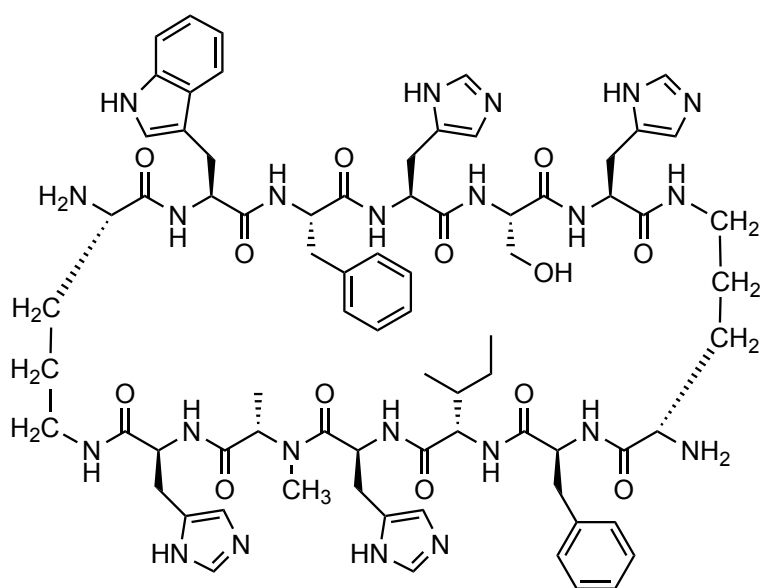

**MC4H-MeA**

MW: 1542.78  
MW+6TFA: 2226.92

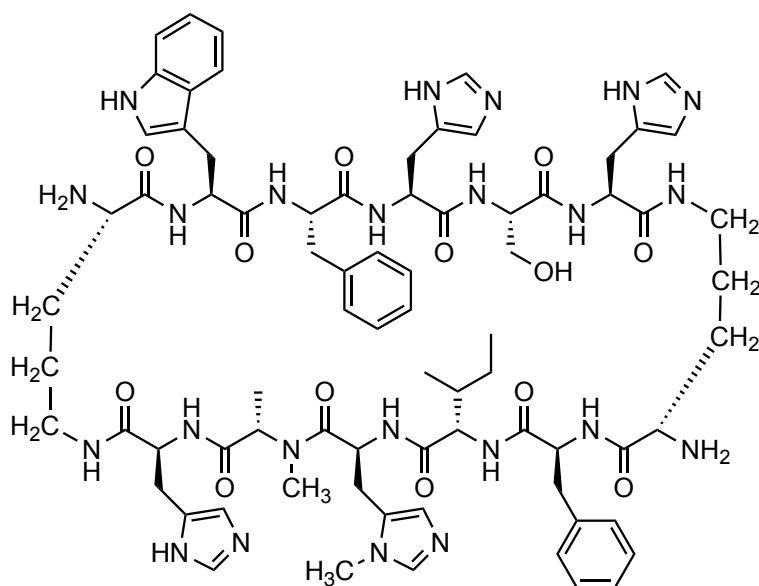

**MC4H-MeAMeH**

MW: 1556.80  
MW+6TFA: 2240.94

### ***Resin loading determination***

2-chlorotriyl chloride resin was coupled with Fmoc-Trp(Boc)-OH, and the resin loading was determined by the amount of attached Fmoc released during deprotection by 4-methylpiperidine.

A ~0.1 mmol of 2-chlorotriyl chloride resin (based on the loading reported by the manufacturer) was allowed to swell in 5 mL DCM at room temperature while being agitated with N<sub>2</sub> gas for 10 min, and then it was drained. 0.22 mmol of Fmoc-Trp(Boc)-OH was dissolved in 8 mL of DCM and 0.3 mL of 2,4,6-collidine, and this mixture was added into the swelled 2-chlorotriyl chloride resin and agitated on an orbital shaker for 8 hr at room temperature, and then it was drained. The resin was initially washed 4 times, each by adding 5 mL DCM, agitating with N<sub>2</sub> for 5 s, and then drained under vacuum. The resin was thoroughly air-dried by pulling vacuum through the cartridge for 30 min.

A known amount of dried resin was transferred into a 1.5 mL microcentrifuge tube, and DMF (800 µL) was added and allowed to swell for 15 mins. Then, 4-methylpiperidine (200 µL) was added, and the mixture was allowed to stand at room temperature for 15 min. The solution above the resin (100 µL) was transferred to a 1 cm quartz cuvette and diluted with DMF (900 µL). A UV-vis spectrum was recorded. The absorbance at 301 nm was used to calculate the resin loading (eq 1). The average resin loading acquired from the four measurements was 0.34 mmol/g.

$$L = \frac{(A_{301} \times V \times d)}{(\epsilon \times w \times M)} \quad (\text{eq S1})$$

where  $L$  = resin loading (mmol/g)  
 $A_{301}$  = absorbance at 301 nm  
 $V$  = volume of sample (mL)  
 $d$  = dilution factor = 10  
 $\epsilon$  = extinction coefficient of Fmoc = 7800 (mL mmol<sup>-1</sup>cm<sup>-1</sup>)  
 $w$  = path length of cuvette (cm)  
 $M$  = mass of resin used (g)

### ***Preparation of amino acid solution***

For a 0.1 mmol scale, 0.20 M of amino acid in DMF is used. 2.5 mL of this solution is used for each coupling step.

### ***Preparation of Oxyma Pure (ethyl cyano(hydroxyimino)acetate) solution***

For a 0.1 mmol scale, 1 M of Oxyma Pure in DMF is used. 0.5 mL of this solution is used for each coupling step.

### ***Preparation of DIC (N,N'-Diisopropylcarbodiimide) solution***

For a 0.1 mmol scale, 1 M of DIC in DMF is used. 1.0 mL of this solution is used for each coupling step.

### ***Preparation of 4-methylpiperidine solution***

For a 0.1 mmol scale, 20% v/v concentration of 4-methylpiperidine in DMF is used. 2.0 mL of this solution is used for each coupling step.

### ***Scheme for automated synthesis***

Peptides were synthesized on a 0.1 mmol scale using the CEM Liberty Blue automated peptide synthesizer. The solvent for all SPPS solutions was DMF unless otherwise stated. The prepared amino acid, Oxyma, and DIC concentrations were 0.20 M, 1.0 M, and 1.0 M respectively. The deprotection solution was 20% (v/v) 4-methylpiperidine in DMF.

1. **Swelling:** 2-chlorotrityl resin preloaded with Fmoc-Trp(Boc)-OH (see “Resin Loading Determination” section above) was allowed to swell in 5 mL DMF at room temperature while being agitated with N<sub>2</sub> gas for 10 min, and then it was drained.
2. **Single coupling 0.1 mmol scale:** A 2 mL volume of 4-methyl-piperidine in DMF (20% v/v) was added to the swelled resin and agitated with N<sub>2</sub> gas for 15 s at 90° C, and then it was drained. The resin was washed 4 times, each by adding 5 mL DMF, agitating with N<sub>2</sub> for 5 s, and then drained. 1.0 mL of 1.0 M DIC and 0.5 mL of 1.0 M Oxyma was added to the reaction vessel containing the resin followed by 2.5 mL of 0.20 M amino acid solution. The solution was allowed to warm to 75° C over the course of 15s and followed by an interval of 110 s being held at 90° C. N<sub>2</sub> gas was used to agitate the reaction vessel before being drained. The resin was washed 4 times, each by adding 5 mL DMF, agitating with N<sub>2</sub> for 5 s, and drained.
3. **Double histidine coupling 0.1 mmol scale:** A 2 mL volume of 4-methyl-piperidine in DMF (20% v/v) was added to the swelled resin and agitated with N<sub>2</sub> gas for 15 s at 90° C, and then it was drained. The resin was washed 4 times each by adding 5 mL DMF, agitating with N<sub>2</sub> for 5 s, and drained. A volume of 1.0 mL of 1.0 M DIC and 0.5 mL of 1.0 M Oxyma was added to the reaction

vessel followed by a volume of 2.5 mL of 0.20 M Fmoc-His(Trt)-OH solution. The solution was ramped to 50 °C over 120 s followed by 480 s held at 50° C with N<sub>2</sub> gas agitation, the reaction vessel was drained. Another round of Oxyma, DIC, and Fmoc-His(Trt)-OH were added as previously described. The resin was washed 4 times, each by adding 5 mL DMF, agitating with N<sub>2</sub> for 5 s, and drained.

4. **Manual  $\pi$ -methyl histidine coupling 0.1 mmol scale:** Due to the insolubility of Fmoc-His( $\pi$ -Me)-OH in DMF, this residue was coupled on manually. The Fmoc-deprotected resin-bound peptide was transferred to a fritted jacketed reaction column using DMF to as a medium. The DMF was drained from the reaction column and the resin was washed 4 times each by adding 5 mL DMF. A 4 mL activated amino acid mixture was made by mixing 2.5 mL of 0.20 M Fmoc-His( $\pi$ -Me)-OH, 1.0 mL of 0.45 M COMU, and 0.5 mL of 1.6 M DIPEA and was added to the resin. The reaction was allowed to proceed for 35 mins at 50 °C with N<sub>2</sub> gas agitation, and then the reaction column was drained. The resin was washed 4 times with 5 mL DMF and later returned to the CEM Liberty Blue. This procedure is only used for the synthesis of **MC4H-MeH** and **MC4H-MeAMeH**.
5. **Final deprotection:** The N-terminal amino acid was deprotected with 4 mL of 20% (v/v) 4-methyl-piperidine for 50 s then drained. The resin was then washed 4 times with 4 mL of DMF and drained.

**Table S1. MC4H**

| Step | Amino Acid | Specific A.A. Derivative | Cycle                      |
|------|------------|--------------------------|----------------------------|
| 1    | Trp        | Fmoc-Trp(Boc)-OH         | swelling (preloaded resin) |
| 2    | Orn        | Boc-Orn(Fmoc)-OH         | single coupling            |
| 3    | His        | Fmoc-His(Trt)-OH         | double histidine coupling  |
| 4    | Sar        | Fmoc-Sar-OH              | single coupling            |
| 5    | His        | Fmoc-His(Trt)-OH         | double histidine coupling  |
| 6    | Ile        | Fmoc-Ile-OH              | single coupling            |
| 7    | Phe        | Fmoc-Phe-OH              | single coupling            |
| 8    | Orn        | Boc-Orn(Fmoc)-OH         | single coupling            |
| 9    | His        | Fmoc-His(Trt)-OH         | double histidine coupling  |
| 10   | Ser        | Fmoc-Ser(tBu)-OH         | single coupling            |
| 11   | His        | Fmoc-His(Trt)-OH         | double histidine coupling  |
| 12   | Phe        | Fmoc-Phe-OH              | single coupling            |
| 13   | N/A        | N/A                      | final deprotection         |

**Table S2. MC4H-MeH**

| Step                                                | Amino Acid | Specific A.A. Derivative | Cycle                      |
|-----------------------------------------------------|------------|--------------------------|----------------------------|
| 1                                                   | Trp        | Fmoc-Trp(Boc)-OH         | swelling (preloaded resin) |
| 2                                                   | Orn        | Boc-Orn(Fmoc)-OH         | single coupling            |
| 3                                                   | His        | Fmoc-His(Trt)-OH         | double histidine coupling  |
| 4                                                   | Sar        | Fmoc-Sar-OH              | single coupling            |
| 5                                                   | N/A        | N/A                      | final deprotection         |
| Removed from CEM for manual coupling of MeH residue |            |                          |                            |
| 6                                                   | MeH        | Fmoc-His( $\pi$ -Me)-OH  | Swelling (preloaded resin) |
| 7                                                   | Ile        | Fmoc-Ile-OH              | single coupling            |
| 8                                                   | Phe        | Fmoc-Phe-OH              | single coupling            |
| 9                                                   | Orn        | Boc-Orn(Fmoc)-OH         | single coupling            |
| 10                                                  | His        | Fmoc-His(Trt)-OH         | double histidine coupling  |
| 11                                                  | Ser        | Fmoc-Ser(tBu)-OH         | single coupling            |
| 12                                                  | His        | Fmoc-His(Trt)-OH         | double histidine coupling  |
| 13                                                  | Phe        | Fmoc-Phe-OH              | single coupling            |
| 14                                                  | N/A        | N/A                      | final deprotection         |

**Table S3. MC4H-MeA**

| Step | Amino Acid | Specific A.A. Derivative | Cycle                      |
|------|------------|--------------------------|----------------------------|
| 1    | Trp        | Fmoc-Trp(Boc)-OH         | Swelling (preloaded resin) |
| 2    | Orn        | Boc-Orn(Fmoc)-OH         | single coupling            |
| 3    | His        | Fmoc-His(Trt)-OH         | double histidine coupling  |
| 4    | MeA        | Fmoc-N-Me-Ala-OH         | single coupling            |
| 5    | His        | Fmoc-His(Trt)-OH         | double histidine coupling  |
| 6    | Ile        | Fmoc-Ile-OH              | single coupling            |
| 7    | Phe        | Fmoc-Phe-OH              | single coupling            |
| 8    | Orn        | Boc-Orn(Fmoc)-OH         | single coupling            |
| 9    | His        | Fmoc-His(Trt)-OH         | double histidine coupling  |
| 10   | Ser        | Fmoc-Ser(tBu)-OH         | single coupling            |
| 11   | His        | Fmoc-His(Trt)-OH         | double histidine coupling  |
| 12   | Phe        | Fmoc-Phe-OH              | single coupling            |
| 13   | N/A        | N/A                      | final deprotection         |

**Table S4. MC4H-MeAMeH**

| Step                                                | Amino Acid | Specific A.A. Derivative | Cycle                      |
|-----------------------------------------------------|------------|--------------------------|----------------------------|
| 1                                                   | Trp        | Fmoc-Trp(Boc)-OH         | Swelling (preloaded resin) |
| 2                                                   | Orn        | Boc-Orn(Fmoc)-OH         | single coupling            |
| 3                                                   | His        | Fmoc-His(Trt)-OH         | double histidine coupling  |
| 4                                                   | MeA        | Fmoc-N-Me-Ala-OH         | single coupling            |
| 5                                                   | N/A        | N/A                      | final deprotection         |
| Removed from CEM for manual coupling of MeH residue |            |                          |                            |
| 6                                                   | MeH        | Fmoc-His( $\pi$ -Me)-OH  | Swelling (preloaded resin) |
| 7                                                   | Ile        | Fmoc-Ile-OH              | single coupling            |
| 8                                                   | Phe        | Fmoc-Phe-OH              | single coupling            |
| 9                                                   | Orn        | Boc-Orn(Fmoc)-OH         | single coupling            |
| 10                                                  | His        | Fmoc-His(Trt)-OH         | double histidine coupling  |
| 11                                                  | Ser        | Fmoc-Ser(tBu)-OH         | single coupling            |
| 12                                                  | His        | Fmoc-His(Trt)-OH         | double histidine coupling  |
| 13                                                  | Phe        | Fmoc-Phe-OH              | single coupling            |
| 14                                                  | N/A        | N/A                      | final deprotection         |

**HFIP cleavage from solid support:** This procedure cleaves the peptide from 2-chlorotrityl resin without removing the sidechain protecting groups. The resin was transferred to a 5 mL fritted polypropylene cartridge and then washed with 5 mL DCM while being swirled by hand for 30 s and then drained by vacuum. The DCM wash was repeated twice, after which the resin was air dried by pulling vacuum through the cartridge. The resin was transferred to a 15 mL centrifuge tube, and a 12 mL cleavage cocktail of 20% 1,1,1,3,3,3-hexafluoroisopropanol (HFIP) in DCM was added to the resin. The mixture was shaken for 90 min on an orbital shaker, filtered through the fritted polypropylene cartridge into a 100 mL round bottom flask, and the resin was washed with 20% HFIP in DCM (3 times 1 mL) followed by DCM washes (3 times 1 mL). The filtrate and washings were dried under vacuum to yield an oily residue.

**Solution phase peptide cyclization:** The deprotected peptide from the HFIP cleavage step was dissolved in DMF (200 mL), and the mixture was transferred into a 500 mL round bottom flask. 2.0 mL of 1.0 M Oxyma in DMF and 2.0 mL of 1.0 M DIC in DMF were added to the round bottom flask, and the mixture was stirred at room temperature for 8 h. Then, the mixture was dried on a rotary evaporator at 70 °C to yield an oily residue.

**Side chain deprotection:** A 10 mL cleavage cocktail of 95% TFA, 2.5% TIPS, and 2.5% water was added to the peptide residue after the cyclization procedure. The mixture was stirred for 3 h and then dried under vacuum to yield an oily residue. Note that crystals of triphenylmethane, derived from trityl protecting groups may also appear.

**Ether Precipitation:** Diethyl ether (~20 mL) was added to the residue after sidechain deprotection, and the mixture was sonicated to obtain a white precipitate, which was transferred to a centrifuge tube and separated from the liquid phase by centrifugation for 3.0 min at 3.0 RCF resulting in a white pellet at the bottom of the centrifuge tube. The liquid phase was then decanted and the pellet was washed twice more with ~20 mL of diethyl ether, each time breaking up the pellet by sonication, and the crude product was allowed to air dry.

#### **Reverse phase high performance liquid chromatography (RP-HPLC)**

Preparative RP-HPLC was performed on a Waters Prep 2545 HPLC, equipped with a C18 (X-Bridge Peptide BEH 5µm, 19x 100 mm) column at a 17 mL/min flow rate monitored at a 214 nm wavelength. Crude samples were dissolved in water and filtered through a 0.2 µm filter before RP-HPLC purification. RP-HPLC was performed with water as the weak solvent and acetonitrile as the strong solvent. HPLC solvents were acidified with 0.1% trifluoroacetic acid (see Table S5 for details). Fractions were analyzed for the product using UPLC-MS. Fractions containing the product were dried by lyophilization.

**Table S5.** HPLC gradients used for purification of synthesized compounds and final yields (accounting for trifluoroacetate anions ion paired with basic residues).

| Compound    | HPLC Gradient | Final Yield (%) |
|-------------|---------------|-----------------|
| MC4H        | 10-50%        | 93 mg (42%)     |
| MC4H-MeH    | 10-50%        | 87 mg (40%)     |
| MC4H-MeA    | 10-50%        | 119 mg (53%)    |
| MC4H-MeAMeH | 10-50%        | 115 mg (51%)    |

\*HPLC gradients used for purification of synthesized compounds and final yields (accounting for six ion-paired trifluoroacetate anions).

### *LC-MS data for reported peptides*

#### *Ultra-performance liquid chromatography (UPLC-MS)*

Mass spectroscopy was performed using a Waters Acquity H-Class PLUS system equipped with a C18 (Acquity UPLC BEHEH 1.7  $\mu\text{m}$ ) column and TUV detector. Low-resolution electrospray ionization data were collected with an inline Waters SQD2 single quadrupole detector.

#### *High Resolution electrospray-ionization mass spectrometry*

High-resolution data were acquired on the Waters Synapt G2-Si ESI/LC-MS.

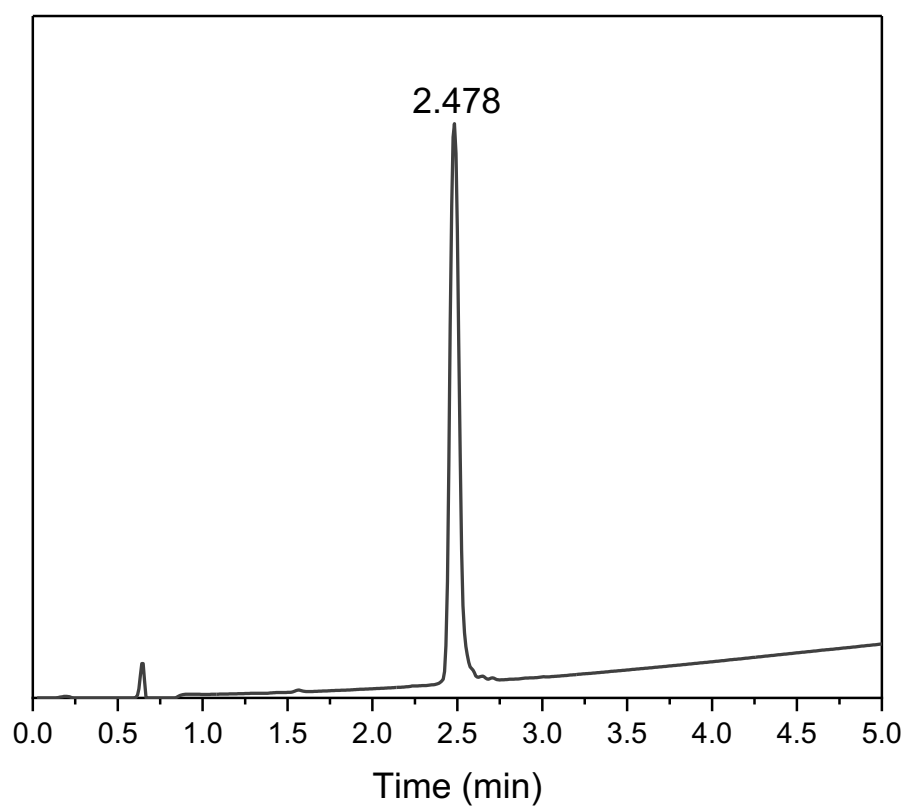

**Figure S1.** LC trace of **MC4H**. Gradient: 5-50% (MeCN/H<sub>2</sub>O with 0.1% TFA) over 5 min.

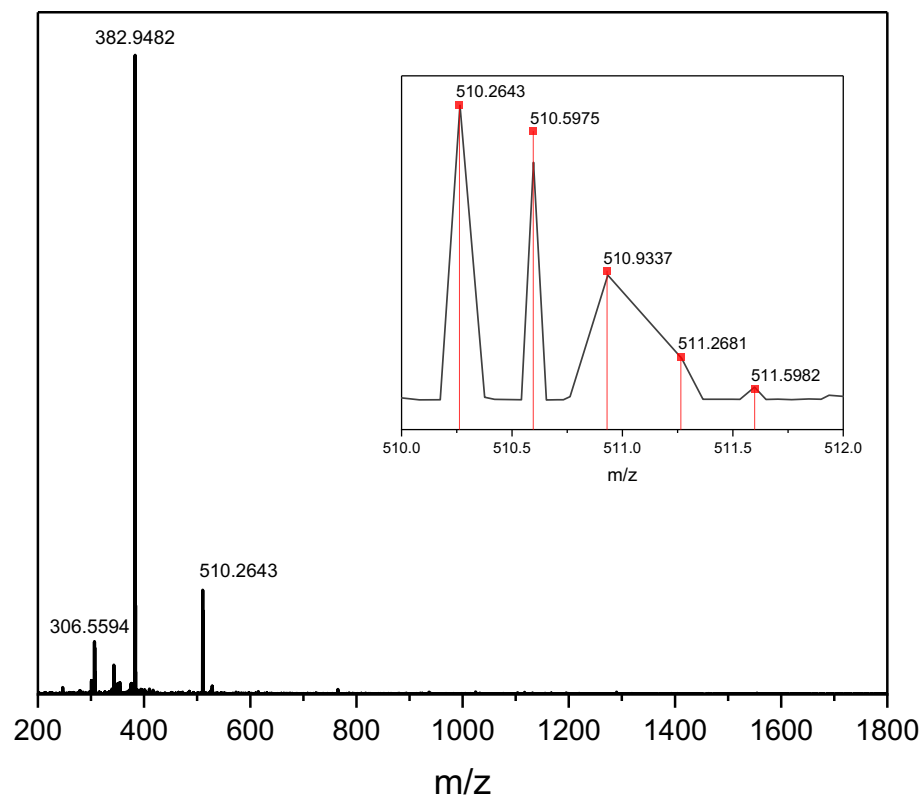

**Figure S2.** The mass spectrum (black) of **MC4H** with observed masses  $[M+3H]^{3+} = 510.2643$ ,  $[M+4H]^{4+} = 382.9482$ , and  $[M+5H]^{5+} = 306.5594$ . Experimental and simulated (red) spectrum for the  $[M+3H]^{3+}$  ion are shown in the inset.

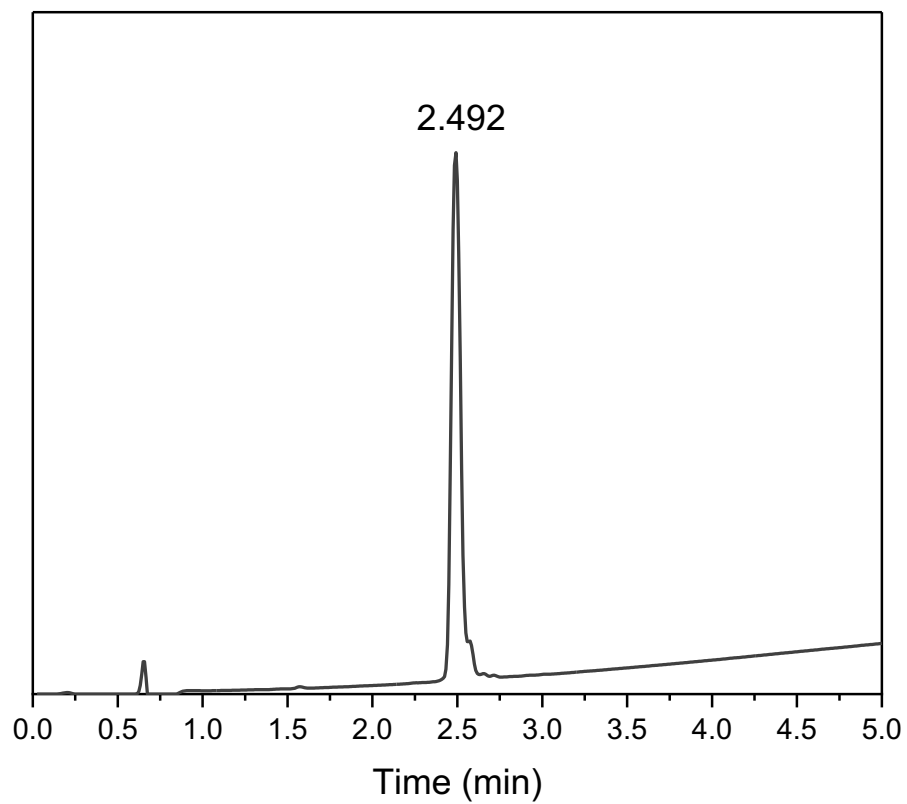

**Figure S3.** LC trace of **MC4H-MeH**. Gradient: 5-50% (MeCN/H<sub>2</sub>O with 0.1% TFA) over 5 min.

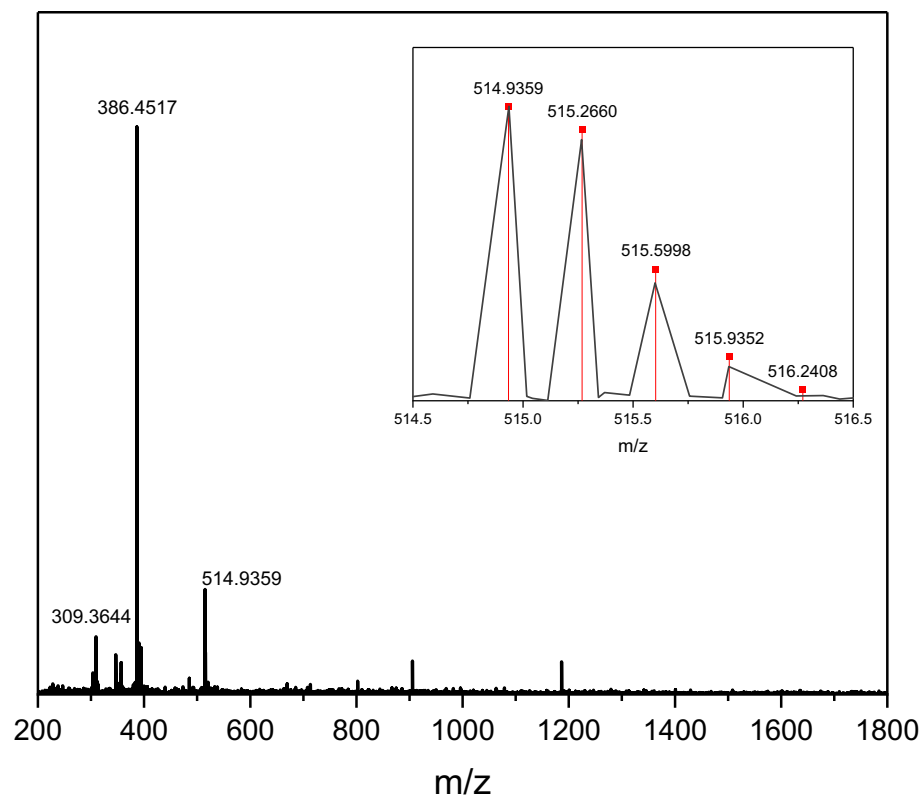

**Figure S4.** The mass spectrum (black) of **MC4H-MeH** with observed masses  $[M+3H]^{3+} = 514.9359$ ,  $[M+4H]^{4+} = 386.4517$ , and  $[M+5H]^{5+} = 309.3644$ . Experimental and simulated (red) spectrum for the  $[M+3H]^{3+}$  ion are shown in the inset.

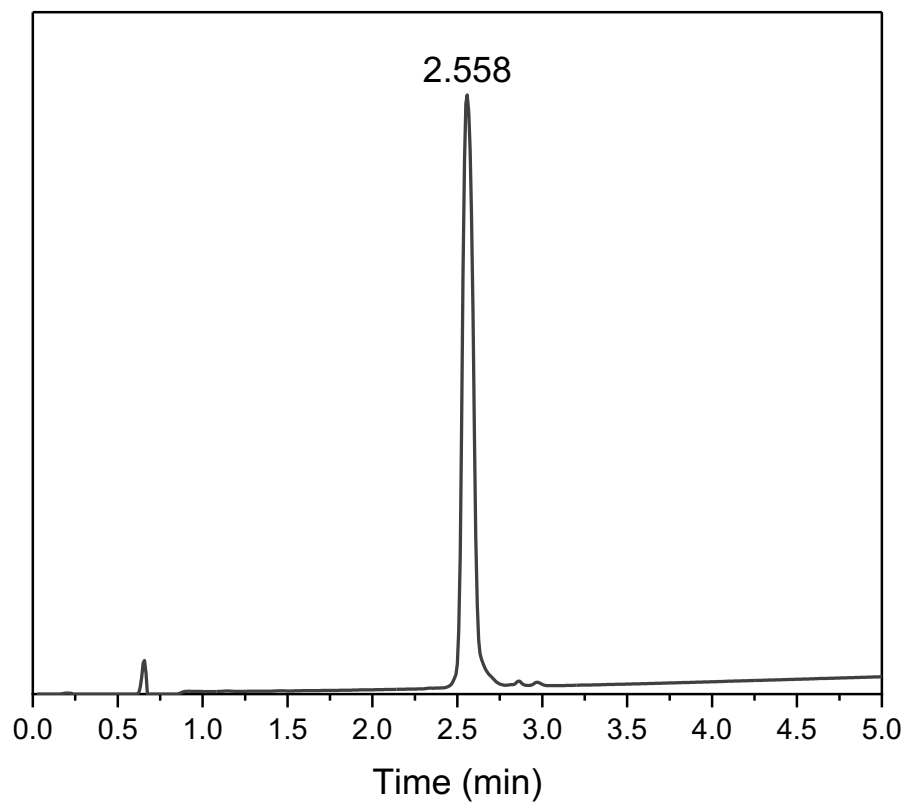

**Figure S5.** LC trace of **MC4H-MeA**. Gradient: 5-50% (MeCN/H<sub>2</sub>O with 0.1% TFA) over 5 min.

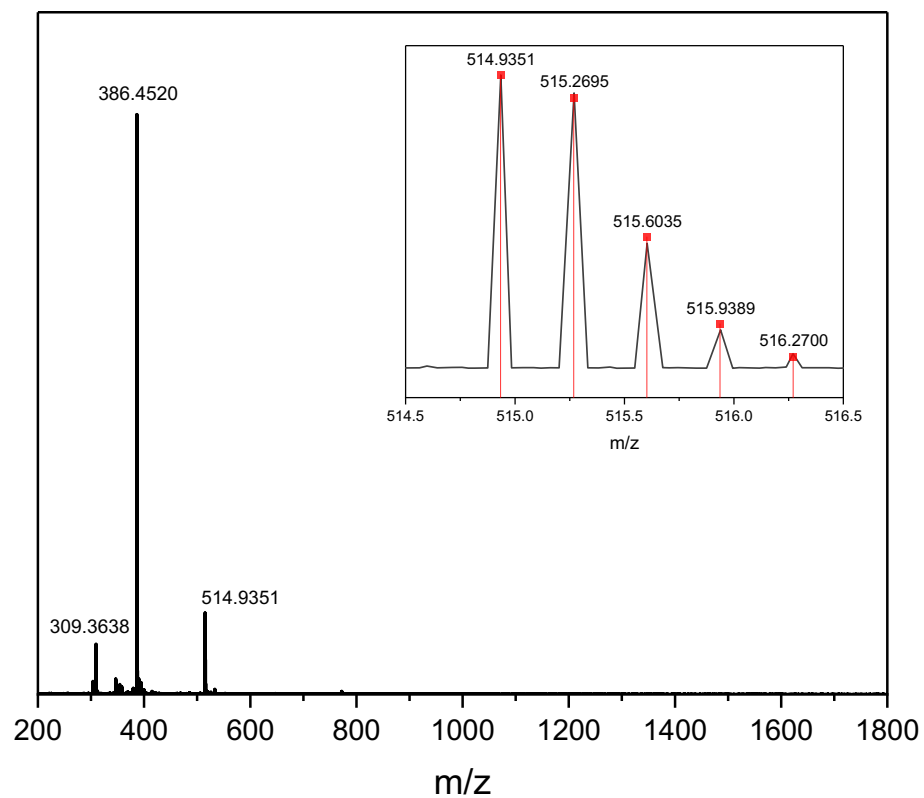

**Figure S6.** The mass spectrum (black) of **MC4H-MeA** with observed masses  $[M+3H]^{3+} = 514.9351$ ,  $[M+4H]^{4+} = 386.4520$ , and  $[M+5H]^{5+} = 309.3638$ . Experimental and simulated (red) spectrum for the  $[M+3H]^{3+}$  ion are shown in the inset.

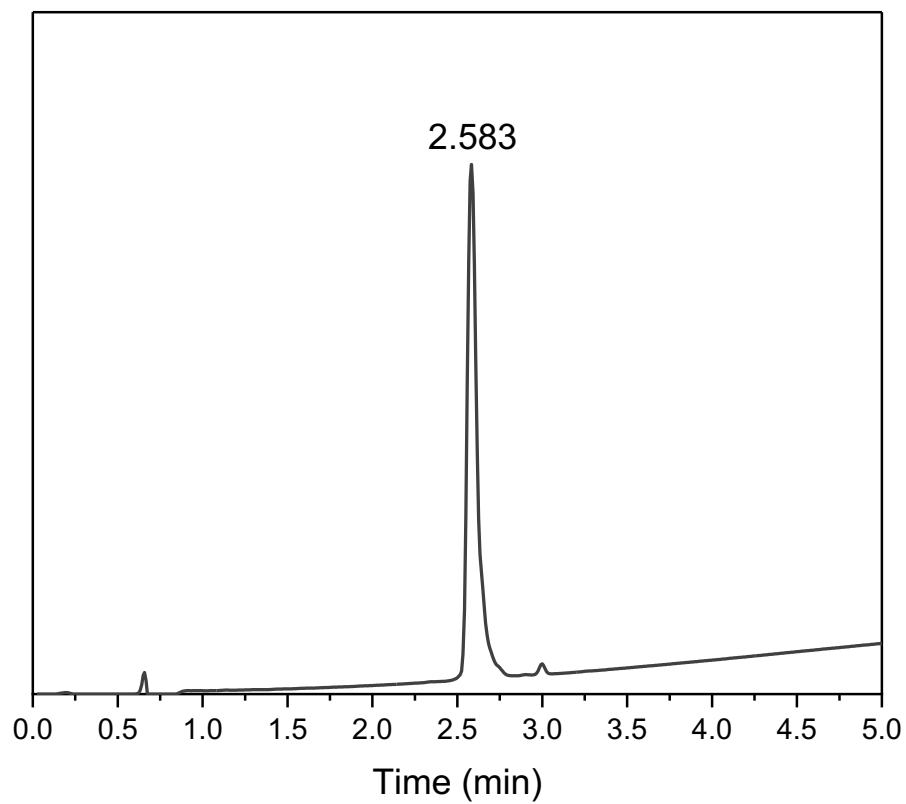

**Figure S7.** LC trace of **MC4H-MeAMeH**. Gradient: 5-50% (MeCN/H<sub>2</sub>O with 0.1% TFA) over 5 min.

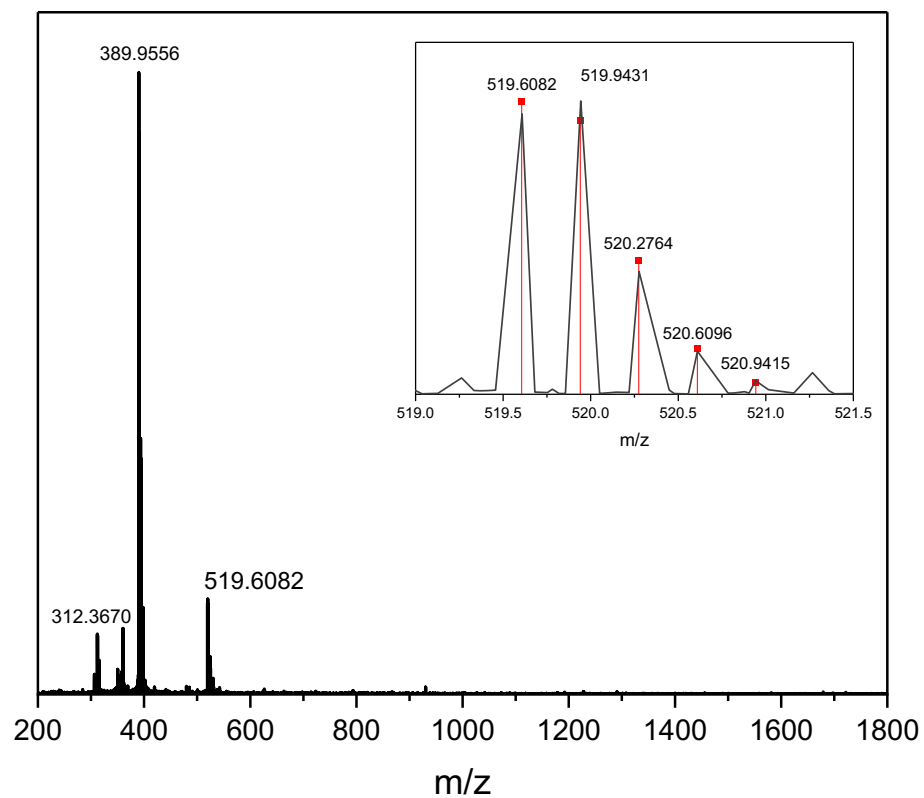

**Figure S8.** The mass spectrum (black) of **MC4H-MeAMeH** with observed masses  $[M+3H]^{3+} = 519.6082$ ,  $[M+4H]^{4+} = 389.9556$ , and  $[M+5H]^{5+} = 312.3670$ . Experimental and simulated (red) spectrum for the  $[M+3H]^{3+}$  ion are shown in the inset.

***Nuclear magnetic resonance (NMR) spectroscopy***

$^1\text{H}$  1D NMR spectra were measured on a Bruker Avance III 500 MHz console using Topspin3.7.0. Peptide samples were dissolved in 90%  $\text{H}_2\text{O}$  and 10%  $\text{D}_2\text{O}$ . The temperature was held at 280 K with a variable temperature module and the peaks are referenced to TMS. 1D  $^1\text{H}$  water suppressed spectra were acquired using the Bruker parameter file ZGESGP having excitation sculpting for the water peak selection and suppression.<sup>1</sup> Typical spectra were acquired with a sweep width of 12ppm, 32 scans, 3 second recycle delays and 1.5s of data acquisition. All spectra below were processed and analyzed with either Topspin3.7.0 or Mnova software.

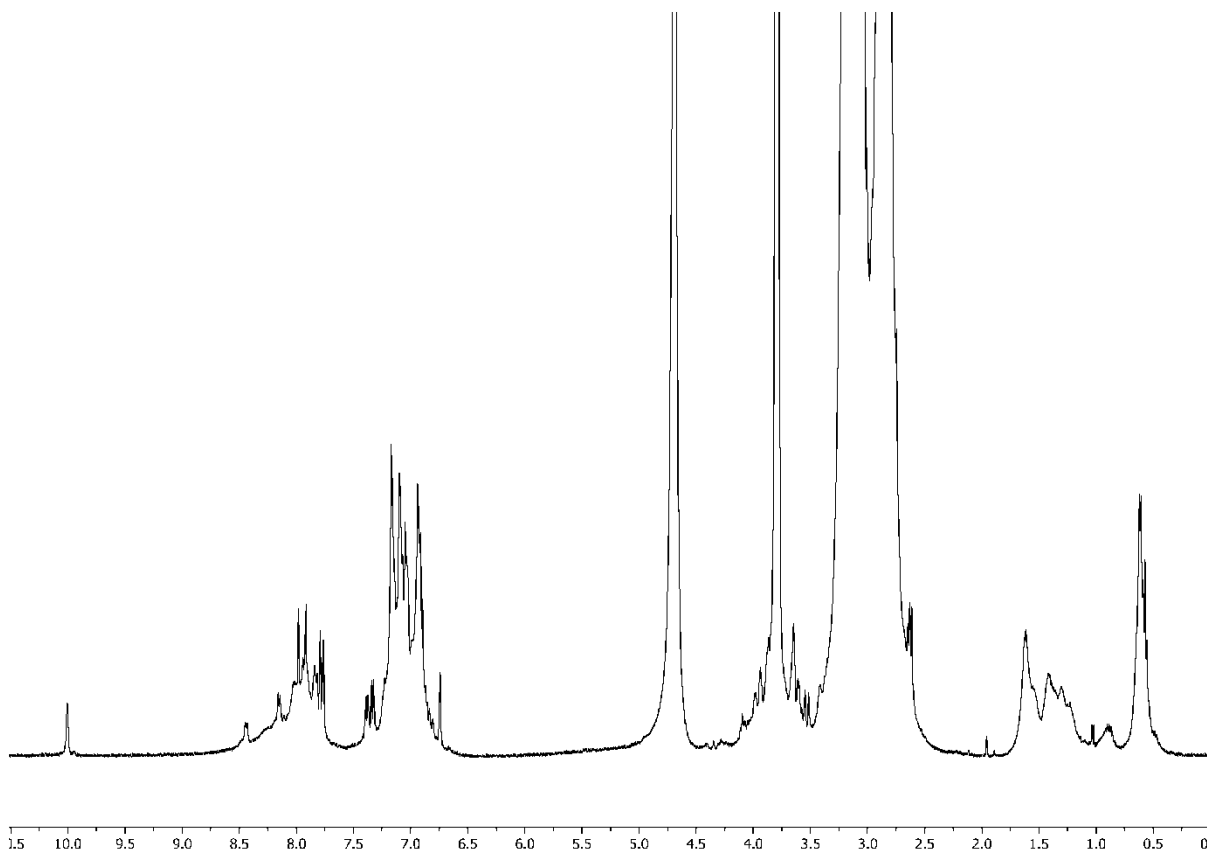

**Figure S9.**  $^1\text{H}$  NMR spectrum of MC4H. Sample dissolved in 0.1 M HEPES pH 7.0 with 10%  $\text{D}_2\text{O}$  and 90%  $\text{H}_2\text{O}$  at 280 K.

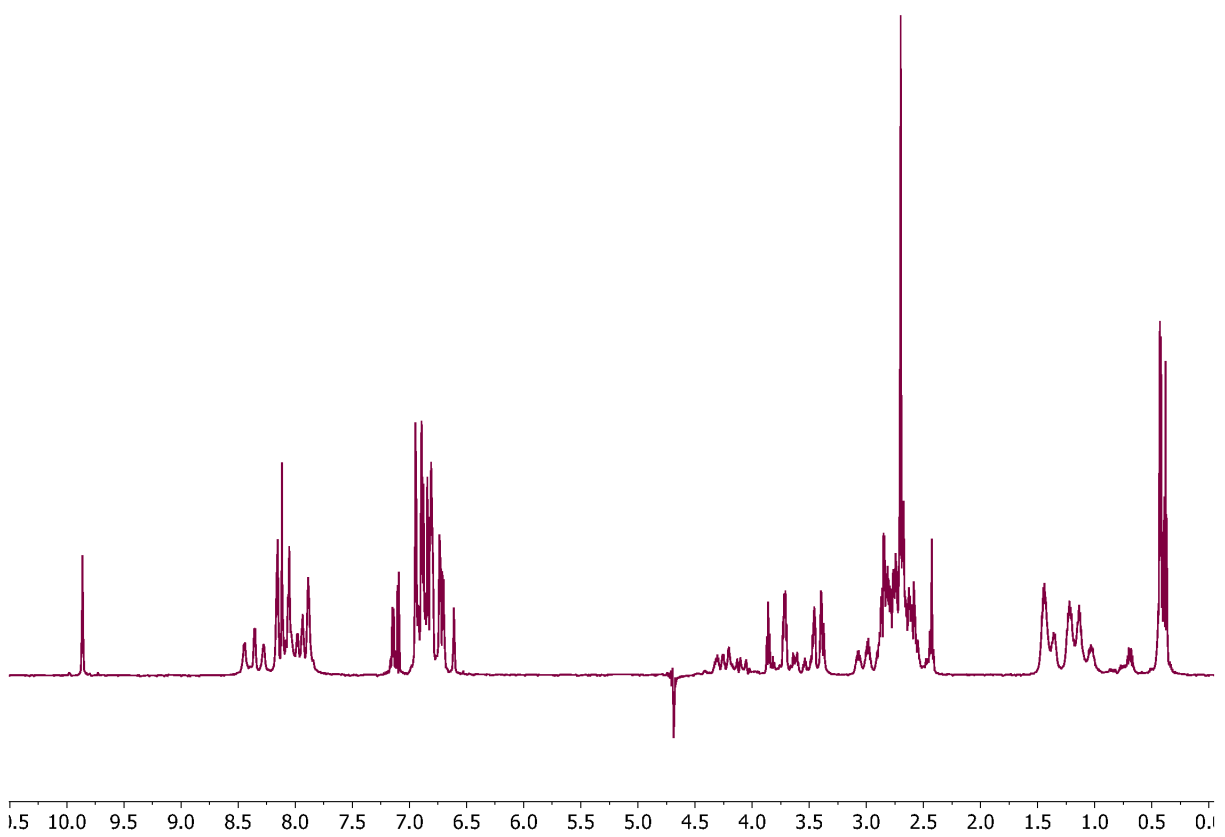

**Figure S10.**  $^1\text{H}$  NMR spectrum of **MC4H**. Sample dissolved in 0.05 M potassium phosphate pH 6.90 with 10%  $\text{D}_2\text{O}$  and 90%  $\text{H}_2\text{O}$  at 280 K.

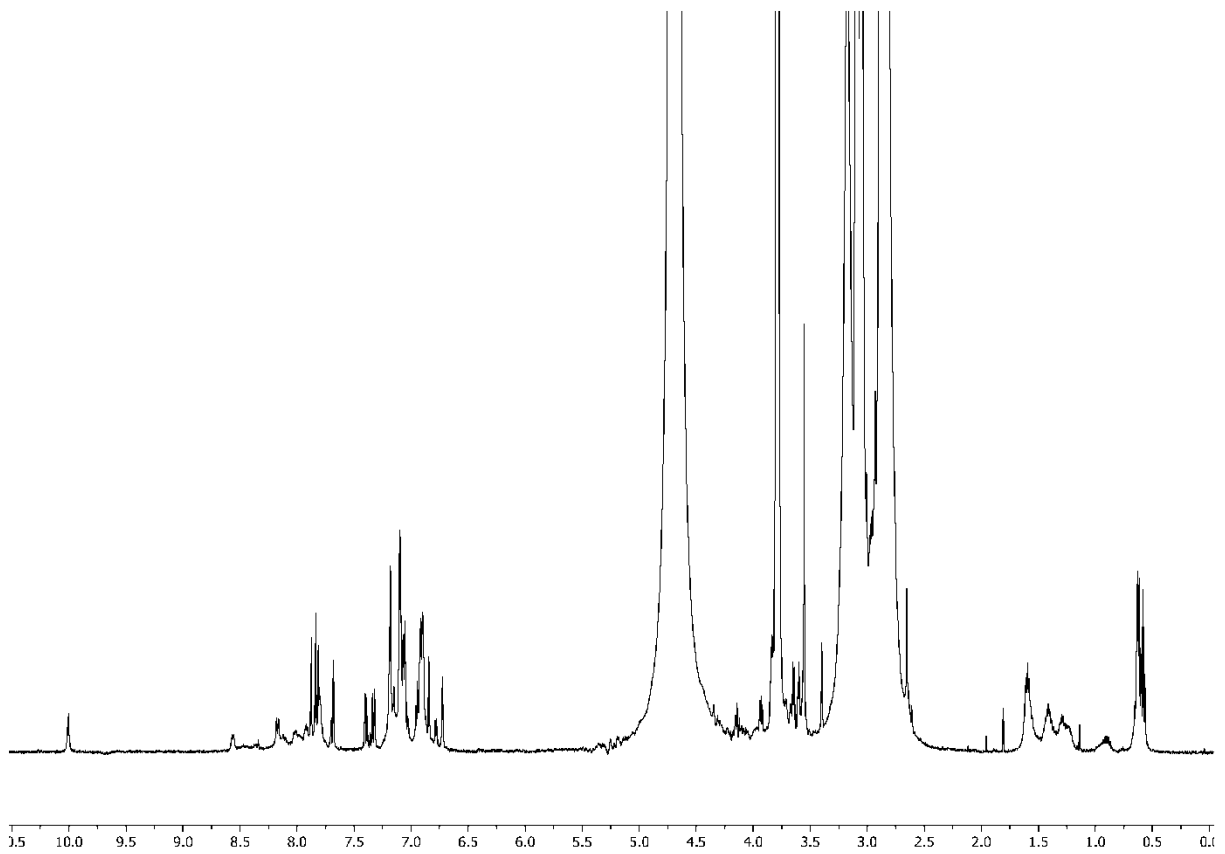

**Figure S11.**  $^1\text{H}$  NMR spectrum of **MC4H-MeH**. Sample dissolved in 0.1 M HEPES pH 7.0 with 10%  $\text{D}_2\text{O}$  and 90%  $\text{H}_2\text{O}$  at 280 K.

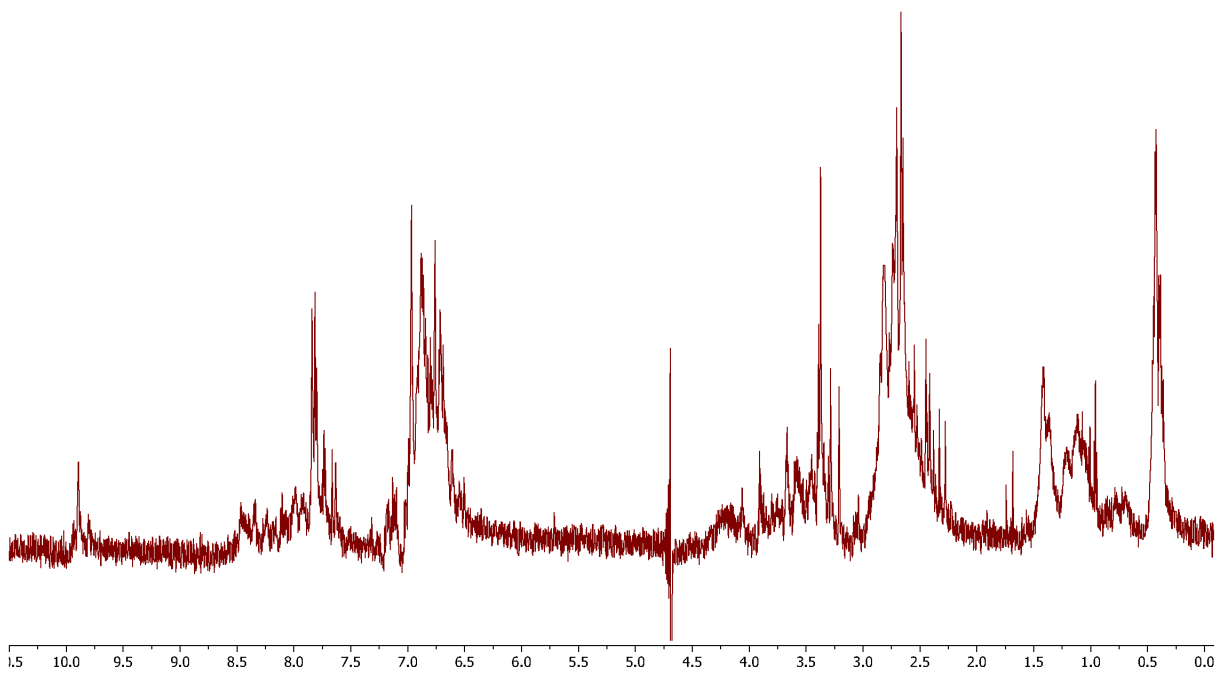

**Figure S12.**  $^1\text{H}$  NMR spectrum of **MC4H-MeH**. Sample dissolved in 0.05 M potassium phosphate pH 6.90 with 10%  $\text{D}_2\text{O}$  and 90%  $\text{H}_2\text{O}$  at 280 K. This peptide has poor solubility, resulting in a noisy spectrum.

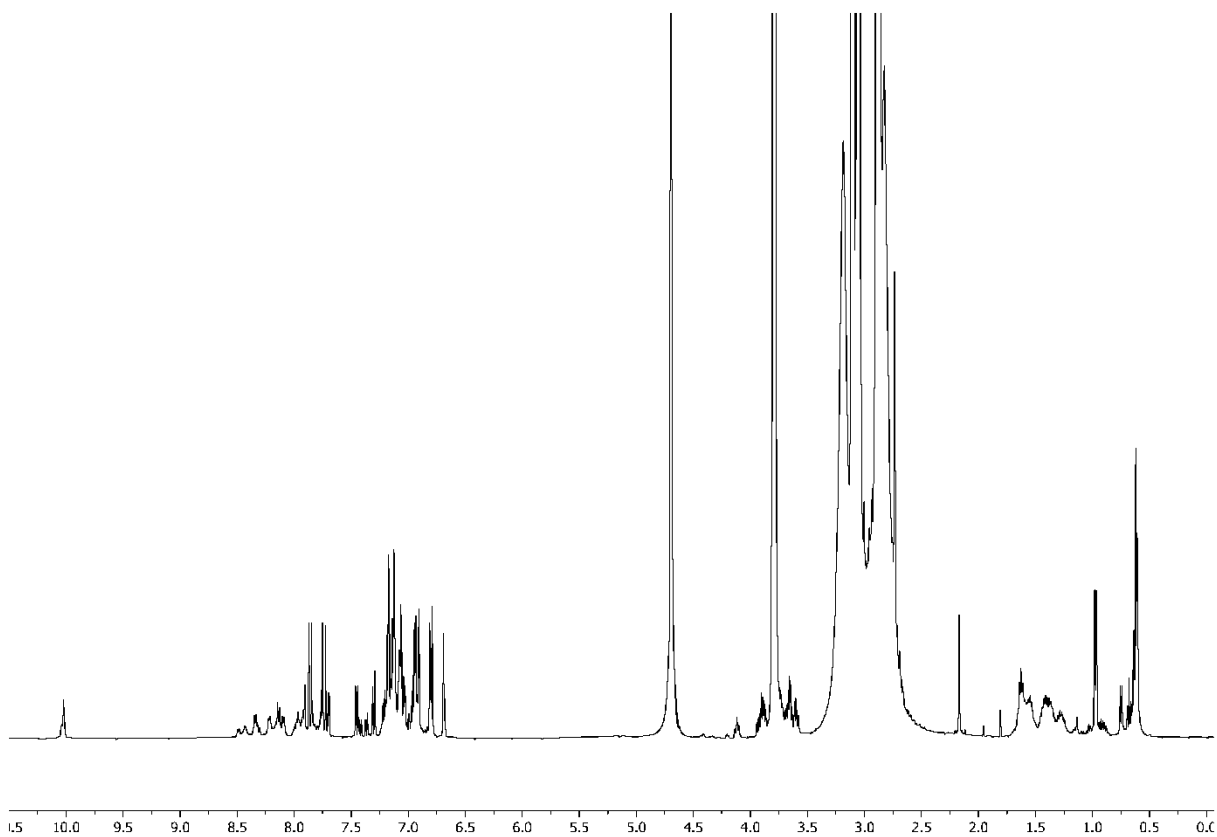

**Figure S13.**  $^1\text{H}$  NMR spectrum of MC4H-MeA. Sample dissolved in 0.1 M HEPES pH 7.0 with 10%  $\text{D}_2\text{O}$  and 90%  $\text{H}_2\text{O}$  at 280 K.

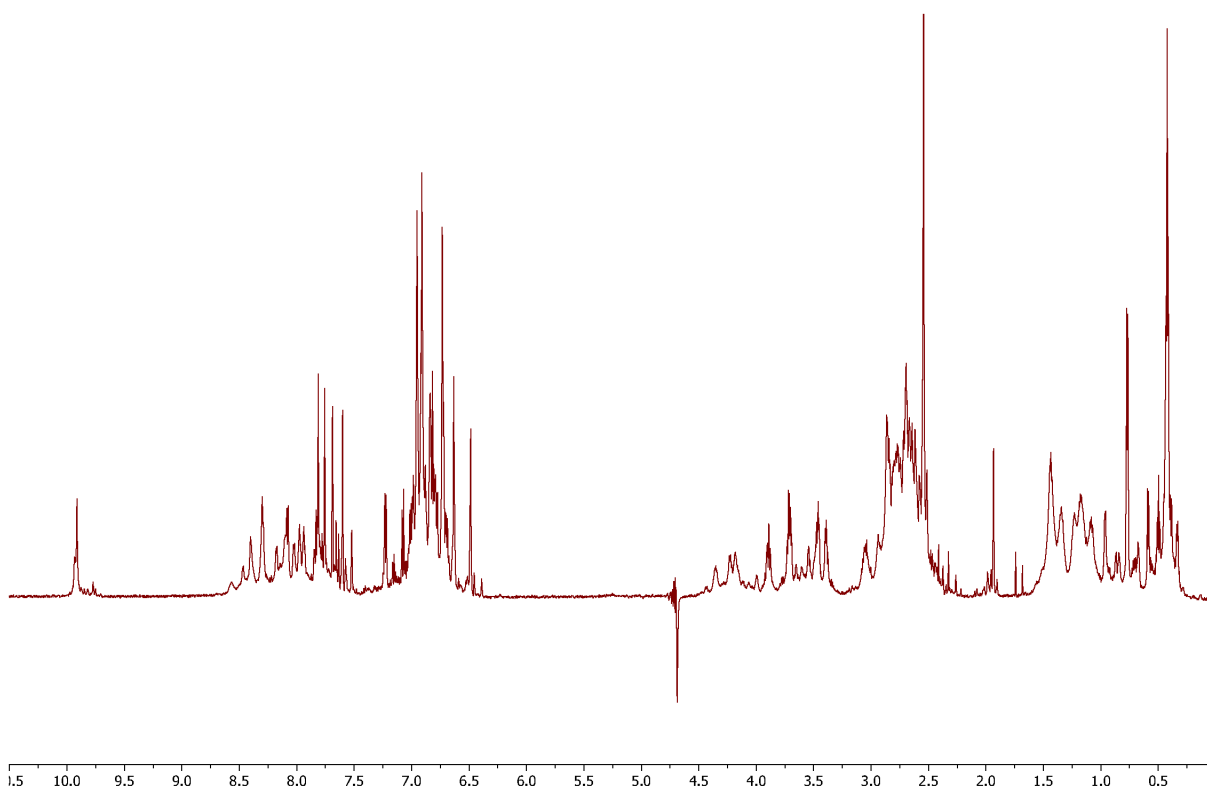

**Figure S14.** <sup>1</sup>H NMR spectrum of **MC4H-MeA**. Sample dissolved in 0.05 M potassium phosphate pH 6.90 with 10% D<sub>2</sub>O and 90% H<sub>2</sub>O at 280 K.

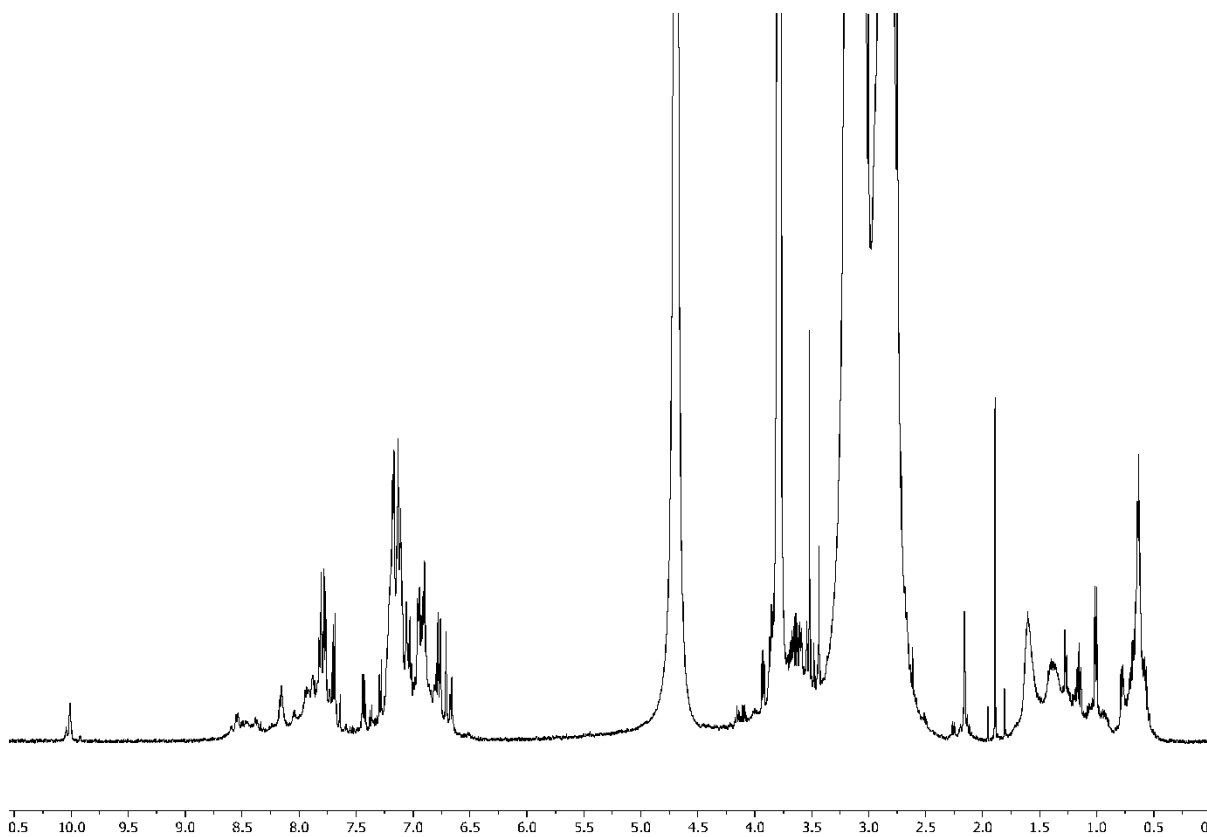

**Figure S15.**  $^1\text{H}$  NMR spectrum of **MC4H-MeAMeH**. Sample dissolved in 0.1 M HEPES pH 7.0 with 10%  $\text{D}_2\text{O}$  and 90%  $\text{H}_2\text{O}$  at 280 K.

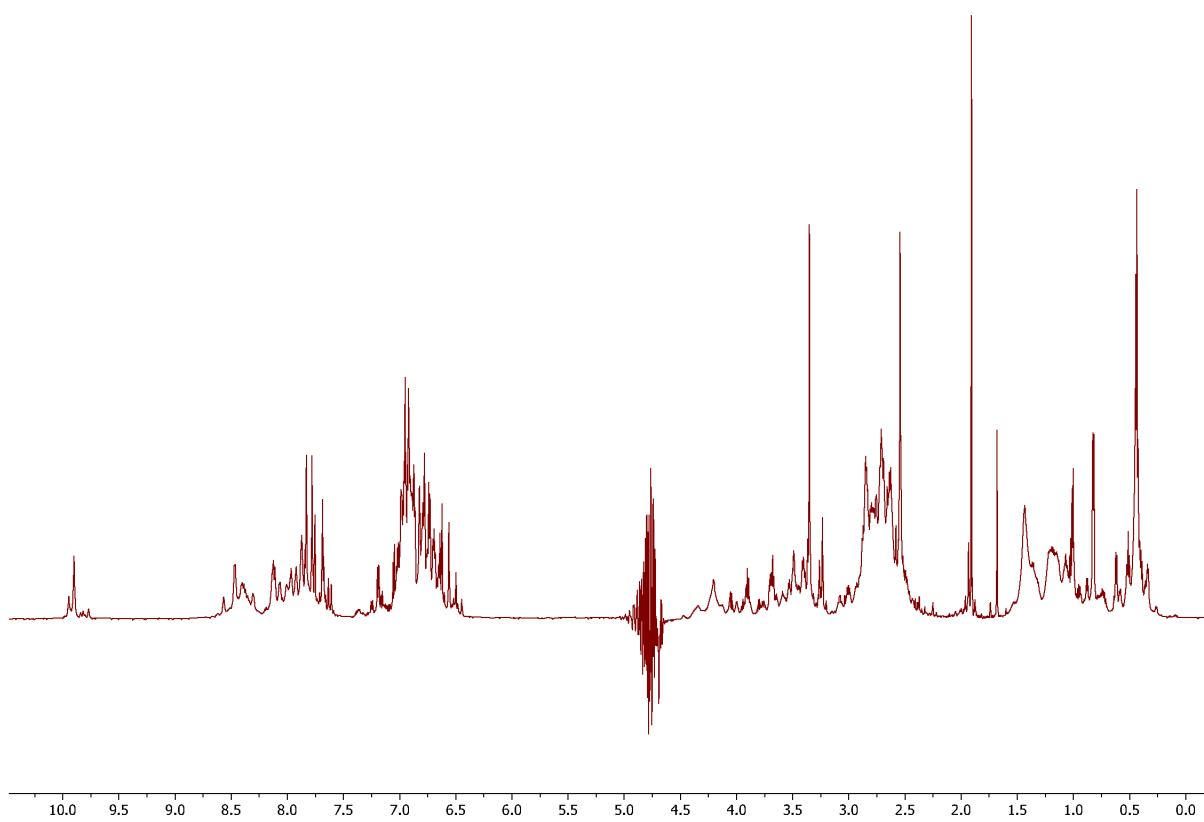

**Figure S16.**  $^1\text{H}$  NMR spectrum of **MC4H-MeAMeH**. Sample dissolved in 0.05 M potassium phosphate pH 6.90 with 10%  $\text{D}_2\text{O}$  and 90%  $\text{H}_2\text{O}$  at 280 K.

### Diffusion NMR methods and processing

The diffusion NMR spectra were acquired using a stimulated echo with bipolar gradients and 3-9-19 water suppression element according to the Bruker pulse program (stebpgp1s19). Each 1D was recorded by linearly incrementing the PFG from 5-95% over 32 steps where the maximum applied gradient strength is 54.5 G/cm. The typical allowed diffusion time (big delta)  $\Delta = d20 = 120$  ms,  $\delta$  (little delta) for Eddy currents = 2 ms, 12 ppm sweep width, 32 scans per increment and 3 second recycle delay.<sup>2</sup> Each individual 1D NMR spectrum, as a function of applied PFG strength, was processed and integrated in MNova. The integrated regions were fitted within *OriginPro* according to eq S2.

The diffusion data were fitted to the classic Stejskal and Tanner analytical equation for a stimulated-echo bipolar pulsed field gradient experiment (eq S2).<sup>[43]</sup>

$$I = I_0 \times e^{-D\gamma^2\delta^2g^2\left(\Delta-\frac{\delta}{3}\right)} \quad (\text{eq S2})$$

where  $I$  = observed intensity  
 $I_0$  = reference intensity unattenuated  
 $D$  = diffusion rate ( $\text{cm}^2 \text{s}^{-1}$ )  
 $g$  = applied Z-gradient strength ( $\text{G cm}^{-1}$ )  
 $\gamma$  = gyromagnetic ratio of the observed nucleus  
 $\delta$  = gradient pulse duration (0.002 s)  
 $\Delta$  = Stejskal-Tanner diffusion delay (0.120 s)

The diffusion coefficient,  $D$  is roughly proportional to  $M^{-\alpha}$ , with  $\alpha$  being a function of the molecular shape.<sup>3</sup>  $\alpha$  is 1/3 for a perfect sphere and 1 for an infinite rod. Experimentally, it is shown that folded polypeptides have  $\alpha \sim 0.39$ , close to the ideal value of 1/3, whereas unfolded chains have  $\alpha \sim 0.58$ . Thus,  $0.33 < \alpha < 0.58$  is reasonable for peptides. While **MC4H** has a higher aspect ratio than a perfect sphere, it is closer to a globular fold than a linear rod, and so we apply  $\alpha = 1/3$ . Since spectroscopic data show all peptides in this work are folded, we assume that the mass ratios of peptides follow the relationship shown by eq S3. We can adjust eq. S3 to account for the mass differences between the reference and the sample to yield eq. S4.

$$\frac{D_1}{D_2} = \left(\frac{M_2}{M_1}\right)^{1/3} \quad (\text{eq S3})$$

where  $D_1$  = diffusion rate of species 1 ( $\text{m}^2 \text{s}^{-1}$ )  
 $D_2$  = diffusion rate of species 2 ( $\text{m}^2 \text{s}^{-1}$ )  
 $M_1$  = molecular mass of species 1 ( $\text{g mol}^{-1}$ )  
 $M_2$  = molecular mass of species 2 ( $\text{g mol}^{-1}$ )

$$\langle O \rangle = \frac{\left(\frac{D_{ref}}{D_s}\right)^3 \times M_{ref}}{M_{mono}} \quad (\text{eq S4})$$

where  $D_{ref}$  = diffusion rate of the monomeric reference species ( $\text{m}^2 \text{s}^{-1}$ )  
 $D_s$  = diffusion rate of the sample species ( $\text{m}^2 \text{s}^{-1}$ )  
 $M_{ref}$  = molecular mass for a monomer of the reference species ( $\text{g mol}^{-1}$ )  
 $M_{mono}$  = expected mass for a monomer of the sample species ( $\text{g mol}^{-1}$ )  
 $\langle O \rangle$  = average oligomeric state

**Table S6.** Oligomerization states of peptides determined by diffusion NMR spectroscopy

| Sample      | $D$ (m <sup>2</sup> /s • 10 <sup>-10</sup> ) | $\langle O \rangle^a$ | %dimer |
|-------------|----------------------------------------------|-----------------------|--------|
| trpzip2     | 2.8                                          | 1.00                  | 0      |
| MC4H        | 2.25                                         | 2.03                  | 100%   |
| MC4H-MeH    | 2.43                                         | 1.60                  | 60%    |
| MC4H-MeA    | 2.60                                         | 1.30                  | 30%    |
| MC4H-MeAMeH | 2.59                                         | 1.31                  | 31%    |

<sup>a</sup>  $\langle O \rangle$  can be defined as the weighted average of dimer and monomer:  $\frac{2[D]+[M]}{[D]+[M]}$  or alternatively  $1 + f_D$

where  $f_D$  is the mole fraction of D, or  $\frac{[D]}{[D]+[M]}$ . For example, a solution composed of 50% dimers correspond to an observed oligomer state of 1.5.

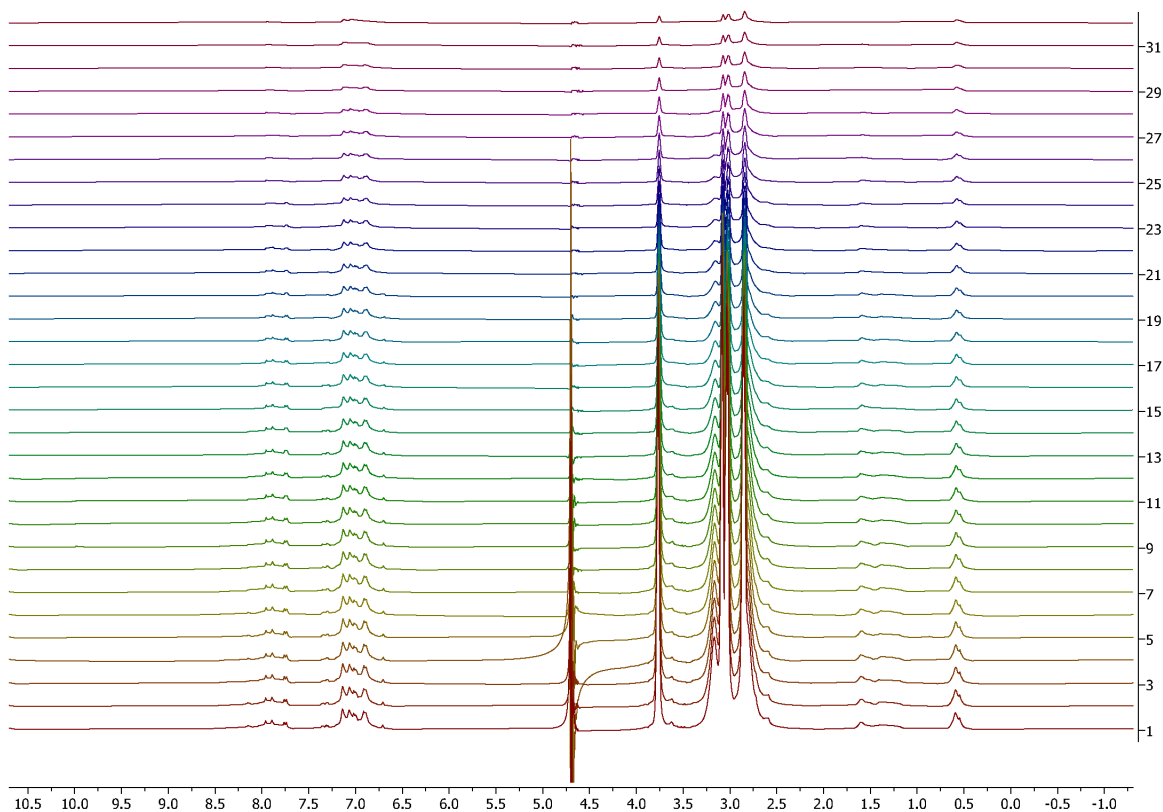**Figure S17.** <sup>1</sup>H NMR spectra of **MC4H** at different applied gradient strengths. Sample dissolved in 0.1 M HEPES pH 7.0 in 10% D<sub>2</sub>O and 90% H<sub>2</sub>O at 280 K.

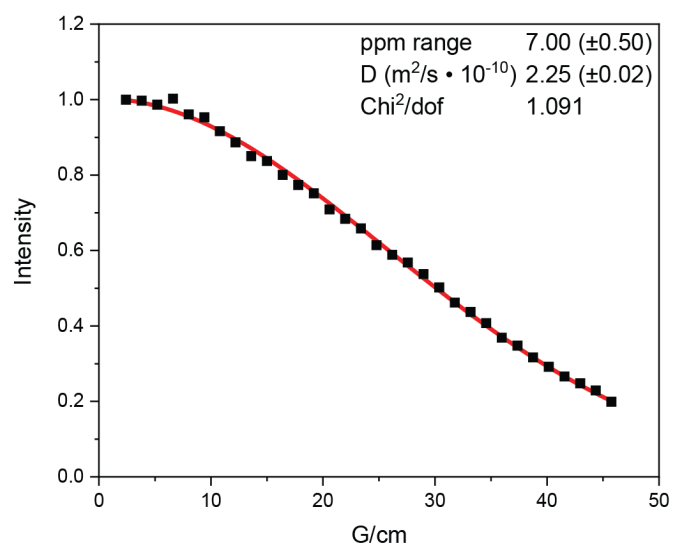

**Figure S18.** Fitting the integrated peaks for **MC4H** from 6.50-7.50 ppm as a function of applied Z-gradient strength, using equation S2.

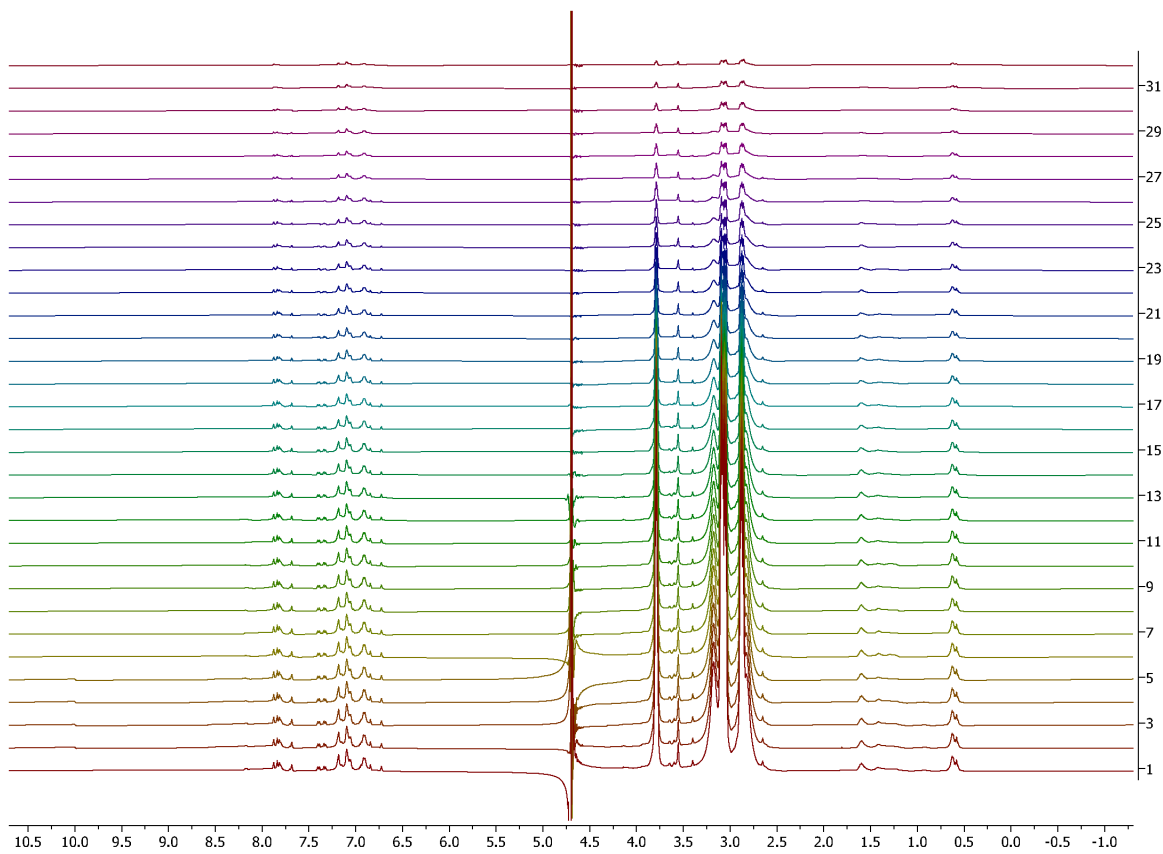

**Figure S19.** <sup>1</sup>H NMR spectra of **MC4H-MeH** at different applied gradient strengths. Sample dissolved in 0.1 M HEPES pH 7.0 in 10% D<sub>2</sub>O and 90% H<sub>2</sub>O at 280 K.

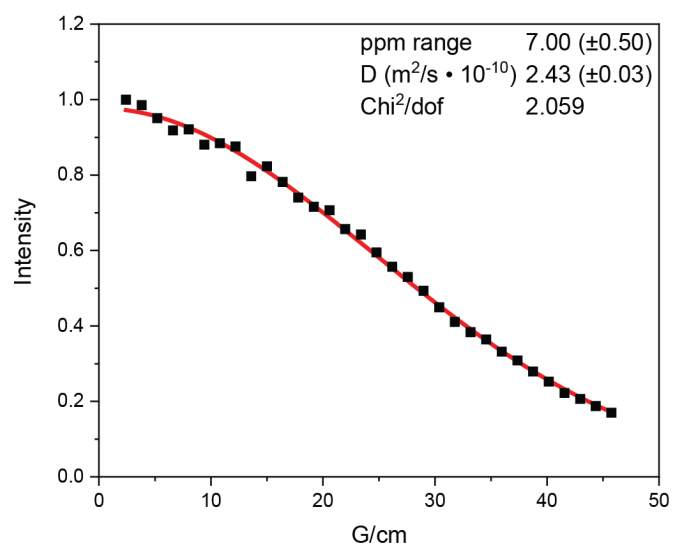

**Figure S20.** Fitting the integrated peaks for **MC4H-MeH** from 6.50-7.50 ppm as a function of applied Z-gradient strength, using equation S2.

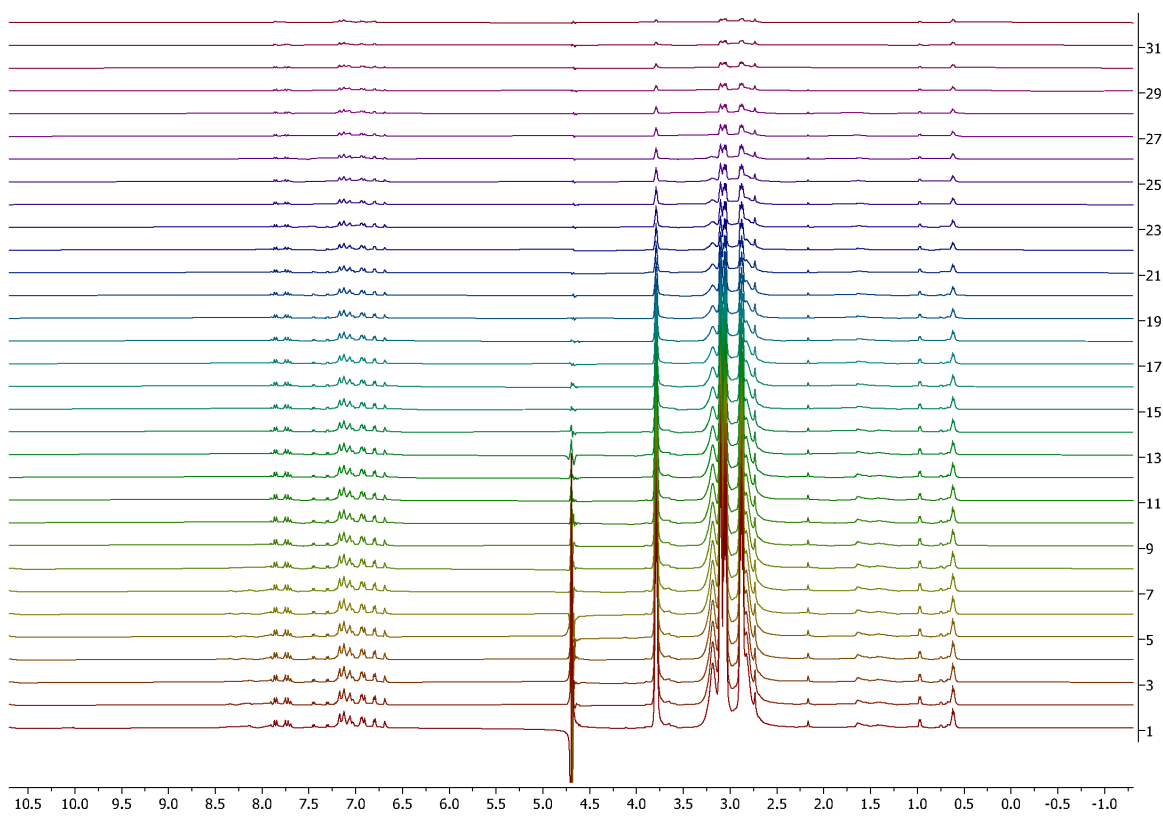

**Figure S21.** <sup>1</sup>H NMR spectra of MC4H-MeA at different applied gradient strengths. Sample dissolved in 0.1 M HEPES pH 7.0 in 10% D<sub>2</sub>O and 90% H<sub>2</sub>O at 280 K.

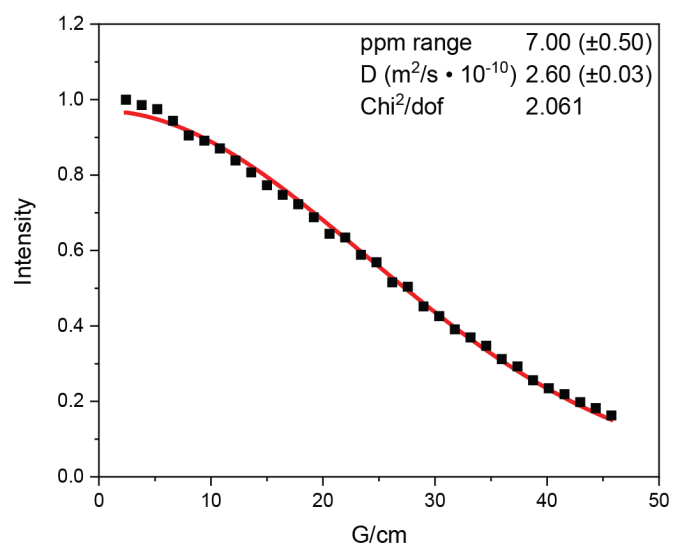

**Figure S22.** Fitting the integrated peaks for **MC4H-MeA** from 6.50-7.50 ppm as a function of applied Z-gradient strength, using equation S2..

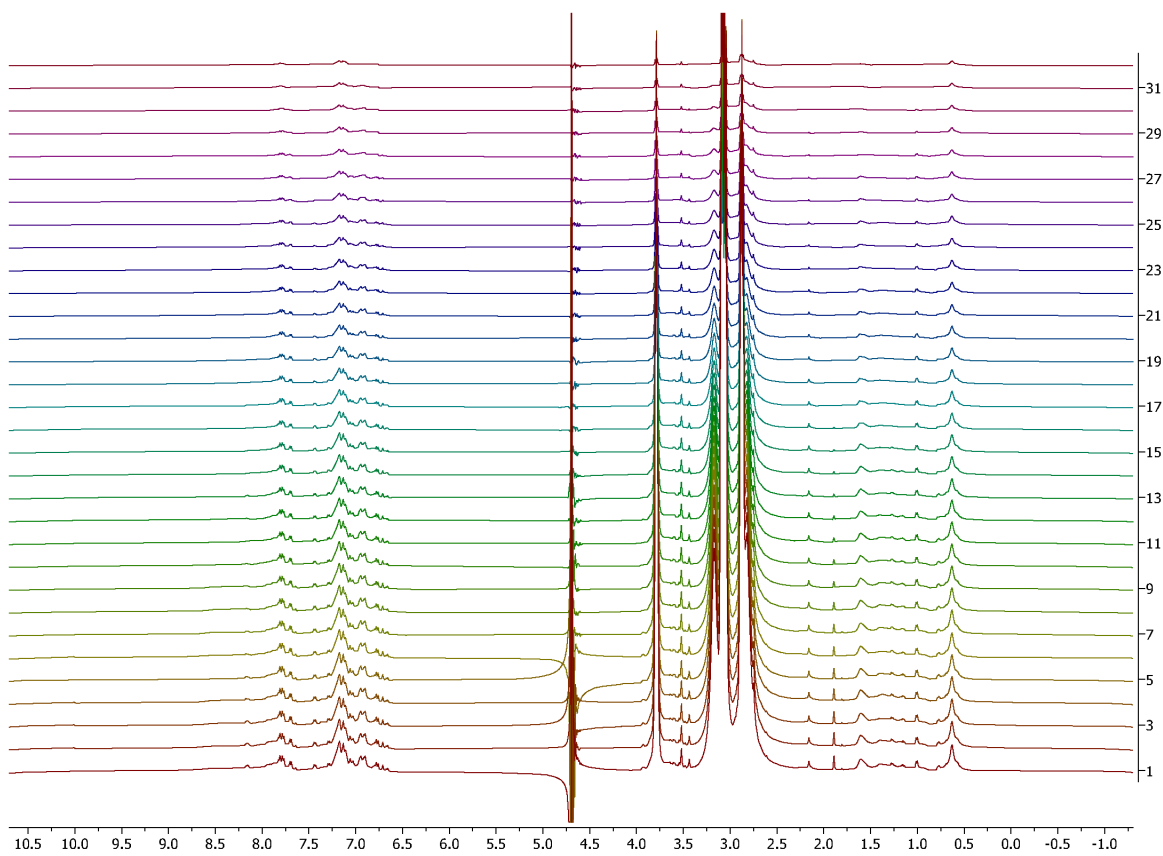

**Figure S23.** <sup>1</sup>H NMR spectra of MC4H-MeAMeH at different applied gradient strengths. Sample dissolved in 0.1 M HEPES pH 7.0 in 10% D<sub>2</sub>O and 90% H<sub>2</sub>O at 280 K.

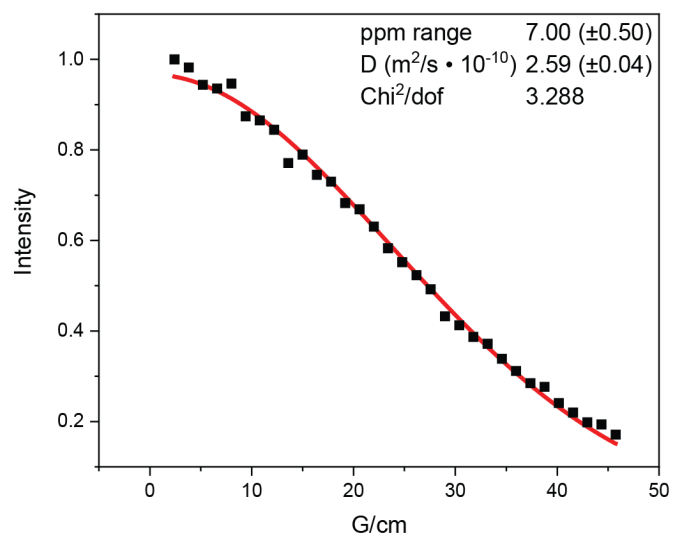

**Figure S24.** Fitting the integrated peaks for **MC4H-MeAMeH** from 6.50-7.50 ppm as a function of applied Z-gradient strength, using equation S2.

### ***Circular dichroism spectroscopy***

The secondary structures of the peptide samples were evaluated using circular dichroism spectroscopy on a Jasco J-1500 Circular Dichroism Spectrophotometer. Samples of 400  $\mu\text{L}$  volume and 0.1 mg/mL concentration in 10 mM HEPES pH. 7.0 were prepared and transferred to a 1.0 mm pathlength quartz cuvette. The ellipticity of each sample was measured from 210–350 nm wavelength, with 5 acquisitions at 25° C and at a scanning speed of 100 nm/min. The ellipticity ( $\theta$  / mdeg) was converted to mean molar ellipticity ( $\Phi$  / mdeg  $\text{M}^{-1} \text{cm}^{-1}$ ) using the equation reported by Kelly et al (eq S6).<sup>5</sup>

$$\Phi = \frac{\theta \cdot M}{10 \cdot n \cdot l \cdot C} \quad (\text{eq S6})$$

$\theta$  is the ellipticity in mdeg,  $M$  is the molecular mass of the sample,  $n$  is the number of amide bonds in the structural formula,  $l$  is the optical path length in cm, and  $C$  is the concentration in mg/mL.

Variable temperature CD data were fit to a model for a two-state transition between a folded dimer (D) and unfolded monomer (M).<sup>6</sup>

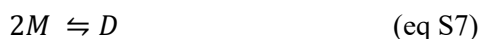

$$K(T) = \frac{[D]_{eq}}{[M]_{eq}^2} \quad (\text{eq S8})$$

At the melting temperature,  $T_m$ , there are equal amounts of folded and unfolded species, and since D carries two copies of folded chains:

$$[M]_{T_m} = 2[D]_{T_m} \quad (\text{eq S9})$$

From mass balance, where  $c$  is the total concentration of peptide monomers, we obtain:

$$c = [M] + 2[D] \quad (\text{eq S10})$$

$$c = 2[M]_{T_m} \quad (\text{eq S11})$$

Substitution of equations S9 and S11 into S8, the equilibrium constant at  $T_m$  is:

$$K(T_m) = \frac{1}{c} \quad (\text{eq S12})$$

$$\Delta G(T_m) = RT_m \ln c \quad (\text{eq S13})$$

Substitution of eq S13 into the Gibbs-Helmholtz equation yields  $K(T)$  as a function of  $T_m$ :

$$\frac{\Delta G(T)}{T} - \frac{\Delta G(T_m)}{T_m} = \Delta H \left( \frac{1}{T} - \frac{1}{T_m} \right) \quad (\text{eq S14})$$

$$-\Delta G(T) = \Delta H \left( \frac{T}{T_m} - 1 \right) - RT \ln c \quad (\text{eq S15})$$

$$K(T) = \exp \left\{ \frac{\Delta H}{RT} \left( \frac{T}{T_m} - 1 \right) - \ln c \right\} \quad (\text{eq S16})$$

Next,  $K(T)$  needs to be related to the observed molar ellipticity  $\Phi(T)$ , which directly reports on  $[D]_{\text{eq}}$ . From equation S8 and S10,  $[D]_{\text{eq}}$  at any temperature for a given  $c$  is calculated by:

$$K = \frac{[D]_{\text{eq}}}{(c - 2[D]_{\text{eq}})^2} \quad (\text{eq S17})$$

$$[D]_{\text{eq}} = \frac{(4cK + 1) - \sqrt{8cK + 1}}{8K} \quad (\text{eq S18})$$

As the model assumes only D is folded, the fraction of folded species,  $\alpha$ , is:

$$\alpha = \frac{2[D]_{\text{eq}}}{c} = \frac{(4cK + 1) - \sqrt{8cK + 1}}{4cK} \quad (\text{eq S19})$$

For convenience, the individual terms of equation S19 are grouped below as:

$$q = 4cK + 1 \quad (\text{eq S20})$$

$$e = \sqrt{8cK + 1} \quad (\text{eq S21})$$

$$d = 4cK \quad (\text{eq S22})$$

$$\alpha = (q - e)/d \quad (\text{eq S23})$$

Finally, the observed molar ellipticity at each temperature,  $\Phi(T)$ , is related to  $\alpha$  by:

$$\Phi(T) = \alpha \Phi_{\text{folded}} + (1 - \alpha) \Phi_{\text{unfolded}} \quad (\text{eq S24})$$

Using OriginPro, equations S16, S20-24 were fit to experimental  $\Phi(T)$  to extract the parameters  $\Delta H$ ,  $T_m$ ,  $\Phi_{\text{folded}}$ , and  $\Phi_{\text{unfolded}}$ .

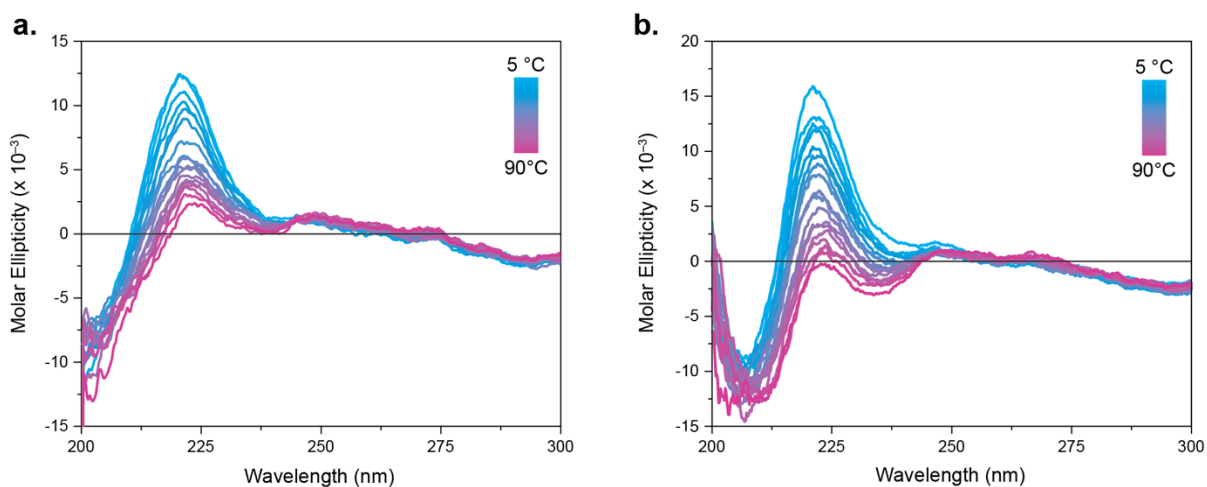

**Figure S25.** Variable temperature CD spectra of (a) **MC4H** and (b) **MC4H-MeH**.

### 2D NMR spectroscopy

Peptides were dissolved in 10% D<sub>2</sub>O and 90% H<sub>2</sub>O and buffered with 0.05 M potassium phosphate buffer pH 6.90. 1D <sup>1</sup>H NMR with excitation sculpting water suppression, 2D-NOESY and 2D-TOCSY spectra were obtained with a Bruker AVIII 750 MHz running Topspin 3.6.2 software. The temperature was calibrated to 280 K with neat methanol and gradient selection and excitation sculpting was used for water suppression. The 1D <sup>1</sup>H NMR was acquired using the Bruker parameter file ZGESGP. The 2D-NOESY were acquired (mixing time = 300 ms) with 16 ppm sweep widths, 16384x1024 complex points in t2xt1 and 16 scans per increment. The starting parameter file calls within Topspin would be NOESYESGPPH and TOCSYESGPPH. Recycle delays between scans were set to 3 s and the t1 acquisition mode was defined as STATES-TPPI. 2D-TOCSY were acquired under similar conditions with DIPS12 (mixing = 70 ms) and a radio-frequency field of 8 kHz. All spectra were processed, viewed, and assigned in MestReNova. The NOESY peaks were manually selected and assigned in MestReNova. Manual NOE assignments/distances were utilized for structure determination starting from CYANA 3.9.8 and further refined in AMBER 14.

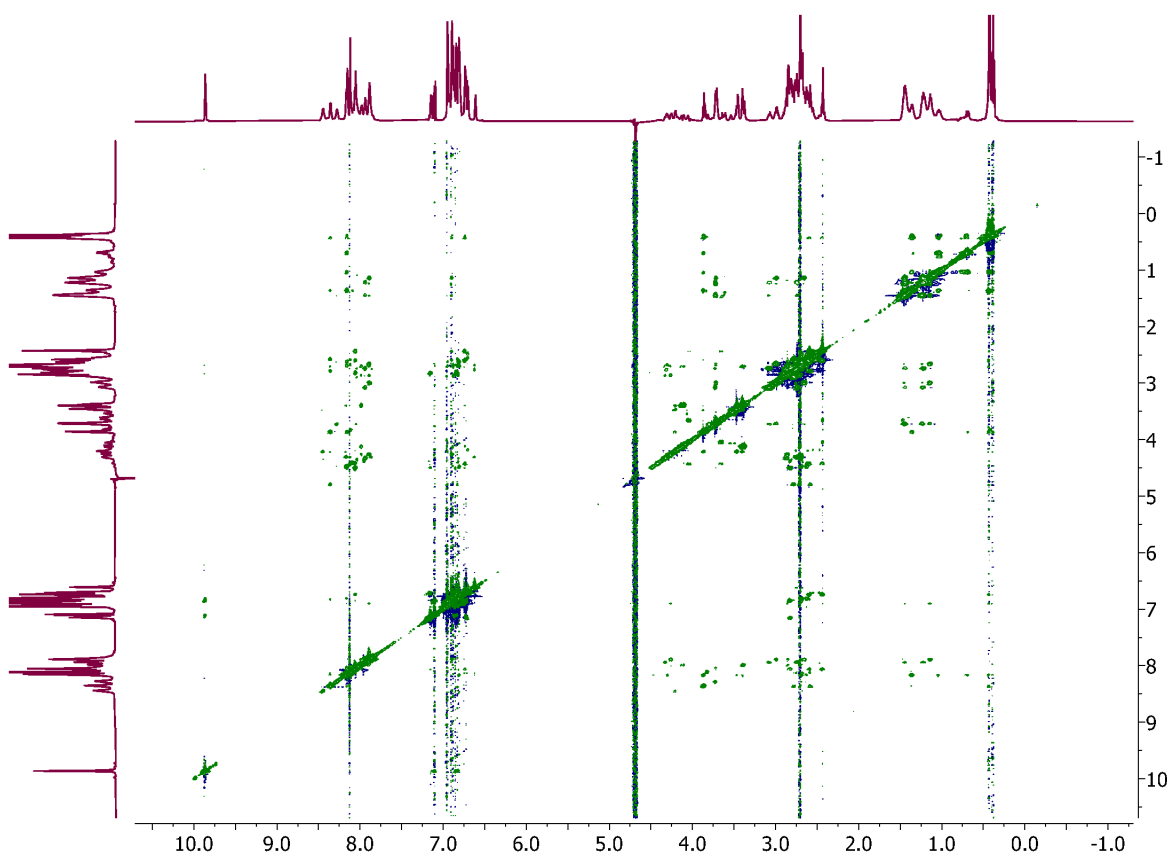

**Figure S26.** 2D NOESY for **MC4H**. Sample dissolved in 0.05 M potassium phosphate buffer pH 6.90 with 10% D<sub>2</sub>O and 90% H<sub>2</sub>O at 280 K.

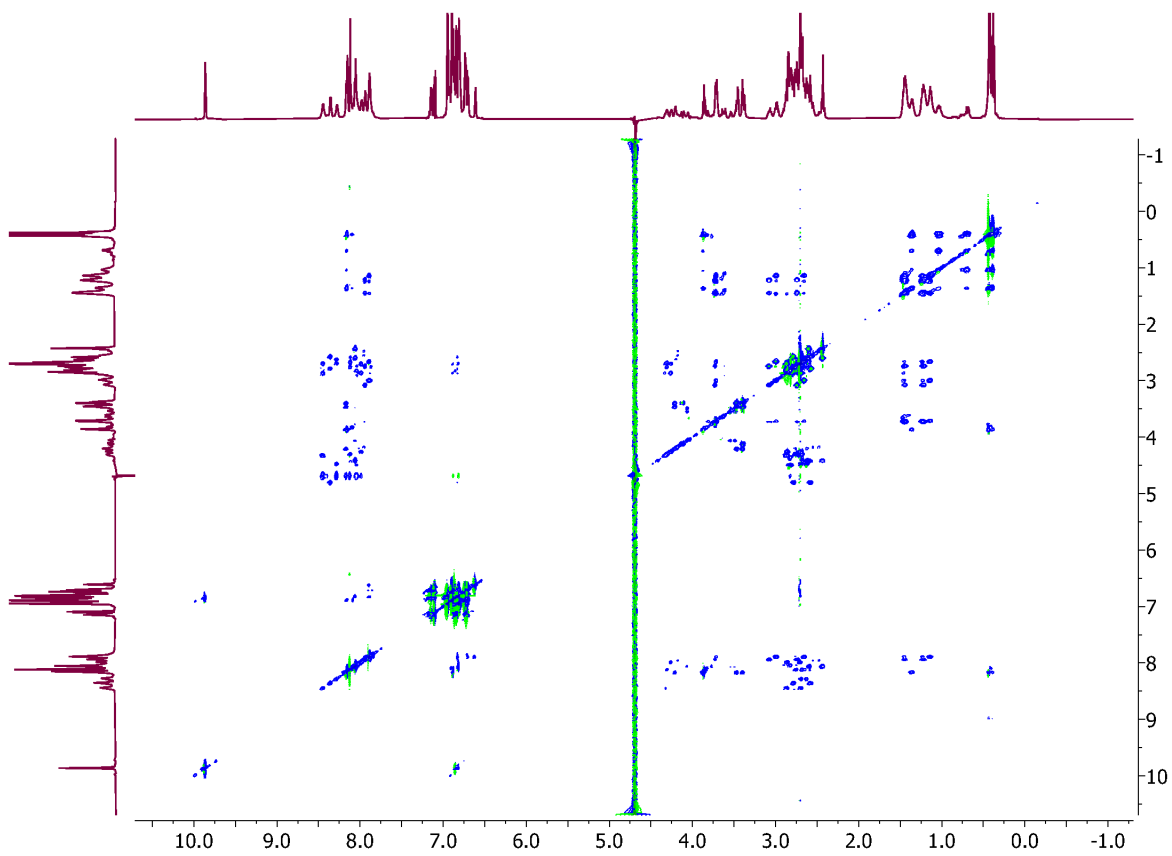

**Figure S27.** 2D TOCSY for **MC4H**. Sample dissolved in 0.05 M potassium phosphate buffer pH 6.90 with 10% D<sub>2</sub>O and 90% H<sub>2</sub>O at 280 K.

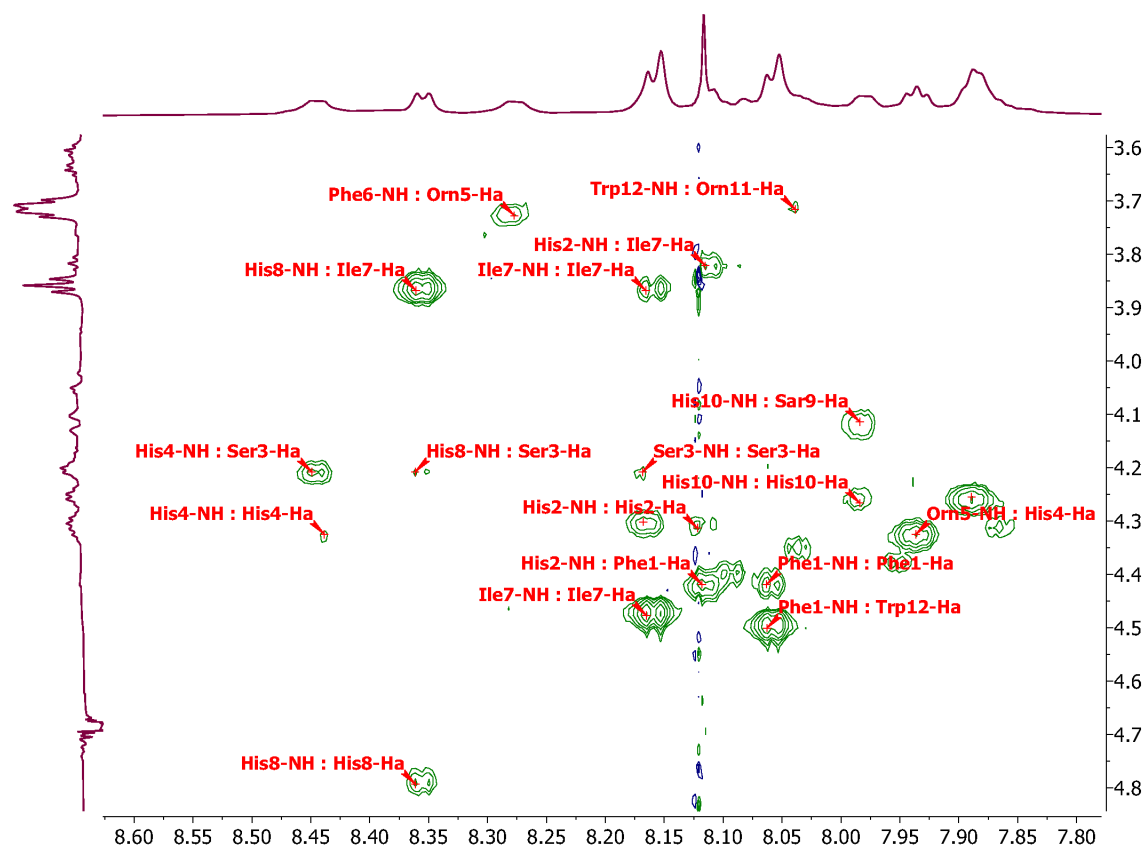

**Figure S28.** NOESY NH-Ha crosspeaks for **MC4H**.

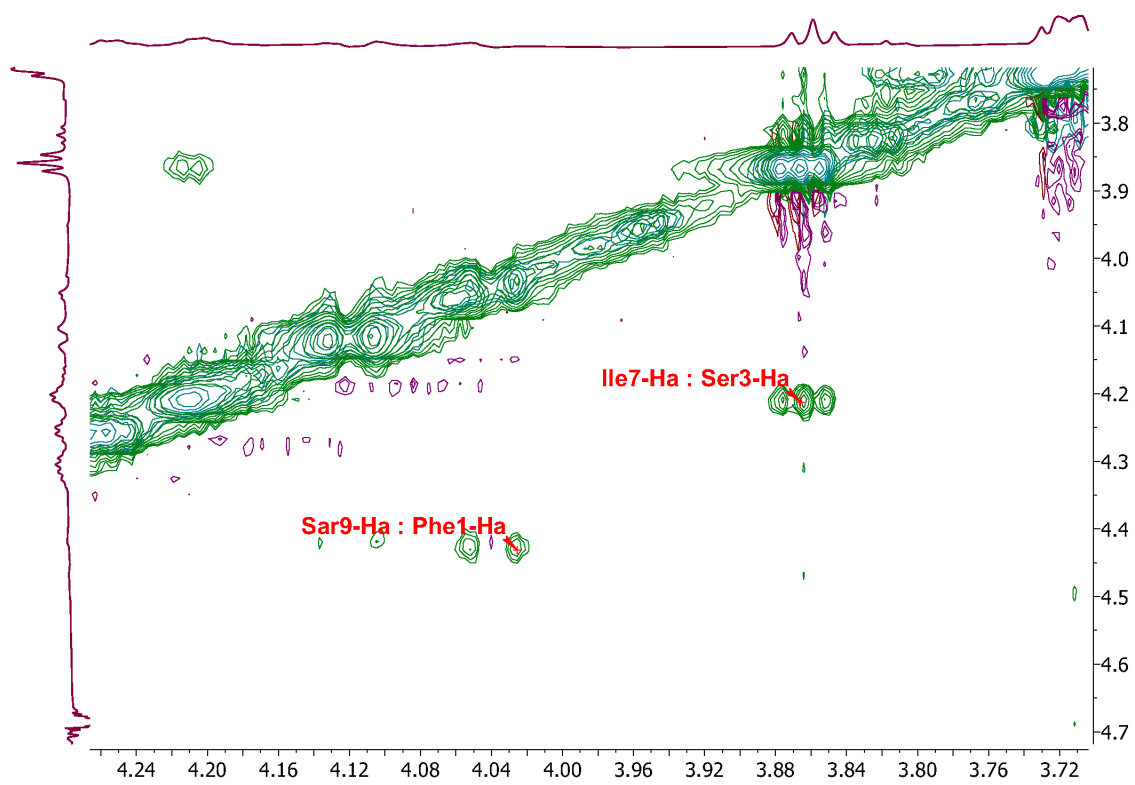

**Figure S29.** NOESY long-range crosspeaks for **MC4H**. Interactions are evidence for antiparallel of  $\beta$ -strands.

**Table S7.** Peak assignments for **MC4H**

| <b>Residue</b> | <b><math>\alpha</math>NH</b> | <b>H<math>_{\alpha}</math></b> | <b>H<math>_{\beta}</math></b> | <b>H<math>_{\gamma}</math></b> | <b>H<math>_{\delta}</math></b> | <b>H<math>_{\epsilon}</math></b> | <b>Misc.</b>                          | <b>J<math>_{\text{NH} - \text{H}\alpha}</math></b> |
|----------------|------------------------------|--------------------------------|-------------------------------|--------------------------------|--------------------------------|----------------------------------|---------------------------------------|----------------------------------------------------|
| <b>Phe1</b>    | 8.06                         | 4.42                           | 2.44<br>2.59                  | -                              | 6.74<br>6.89                   | 6.90                             | H $_{\zeta}$ 6.88                     | 7.86 Hz                                            |
| <b>His2</b>    | 8.12                         | 4.31                           | 2.67<br>2.76                  | -                              | 6.62                           | 7.90                             | -                                     | 6.40 Hz                                            |
| <b>Ser3</b>    | 8.17                         | 4.21                           | 3.40<br>3.47                  | -                              | -                              | -                                | -                                     | 8.15 Hz                                            |
| <b>His4</b>    | 8.45                         | 4.33                           | 2.74<br>2.86                  | -                              | 6.82                           | 8.05                             | -                                     | 6.76 Hz                                            |
| <b>Orn5</b>    | -                            | 3.73                           | 1.44                          | 1.22                           | 2.66<br>3.07                   | -                                | $\delta$ NH 7.94                      | -                                                  |
| <b>Phe6</b>    | 8.29                         | 4.48                           | 2.63<br>2.69                  | -                              | 6.81                           | 6.80                             | H $_{\zeta}$ 6.95                     | 6.49 Hz                                            |
| <b>Ile7</b>    | 8.16                         | 3.87                           | 1.36                          | 0.69<br>1.03                   | 0.38                           | -                                | $\gamma$ Me 0.44                      | 8.57 Hz                                            |
| <b>His8</b>    | 8.36                         | 4.79                           | 2.58<br>2.79                  | -                              | 6.83                           | 7.88                             | -                                     | 7.89 Hz                                            |
| <b>Sar9</b>    | -                            | 3.64<br>4.12                   | -                             | -                              | -                              | -                                | $\alpha$ NMe 2.70                     | -                                                  |
| <b>His10</b>   | 7.99                         | 4.26                           | 2.71<br>2.85                  | -                              | 6.88                           | 8.17                             | -                                     | 6.94 Hz                                            |
| <b>Orn11</b>   | -                            | 3.71                           | 1.46                          | 1.14<br>1.23                   | 2.99                           | -                                | $\delta$ NH 7.89                      | -                                                  |
| <b>Trp12</b>   | 8.04                         | 4.49                           | 2.83                          | -                              | 6.85                           | 7.15                             | H $_{\zeta}$ 6.84<br>H $_{\eta}$ 6.62 | 5.79 Hz                                            |

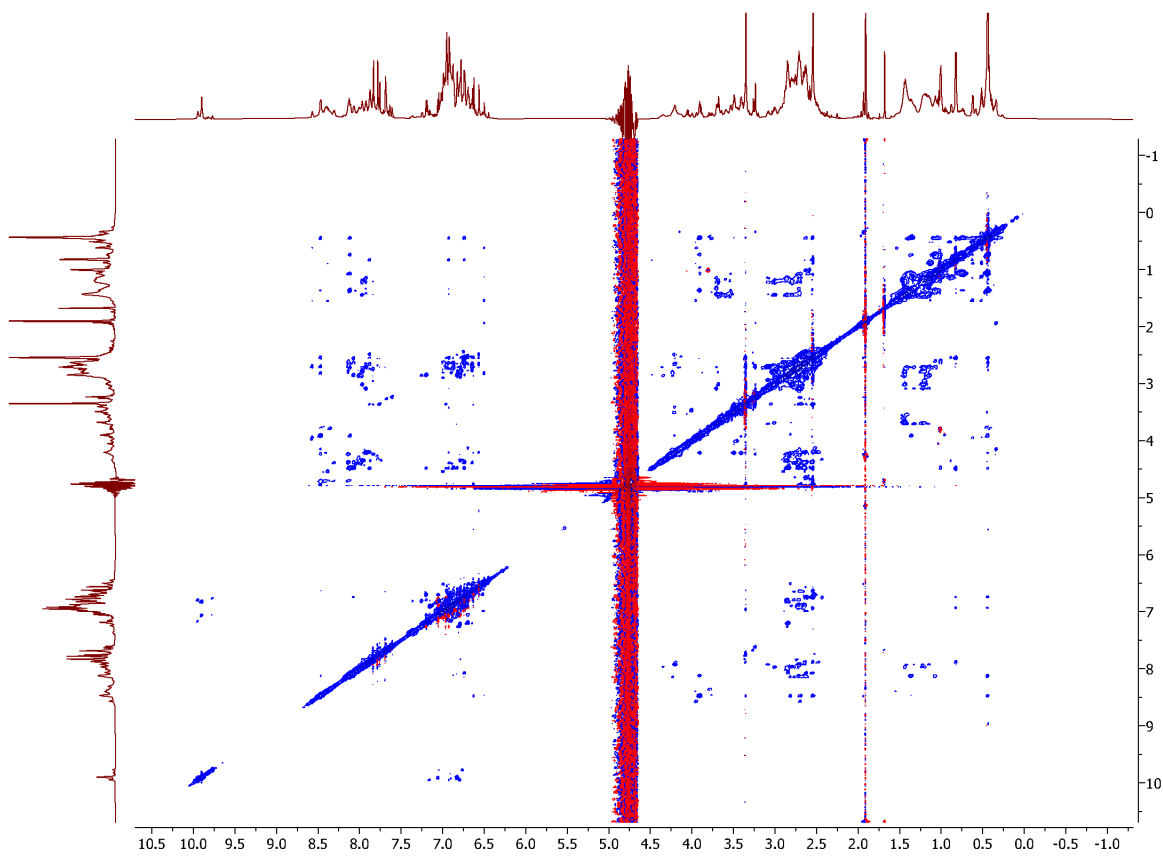

**Figure S30.** 2D NOESY for **MC4H-MeAMeH**. Sample dissolved in 0.05 M potassium phosphate buffer pH 6.90 with 10% D<sub>2</sub>O and 90% H<sub>2</sub>O at 280 K.

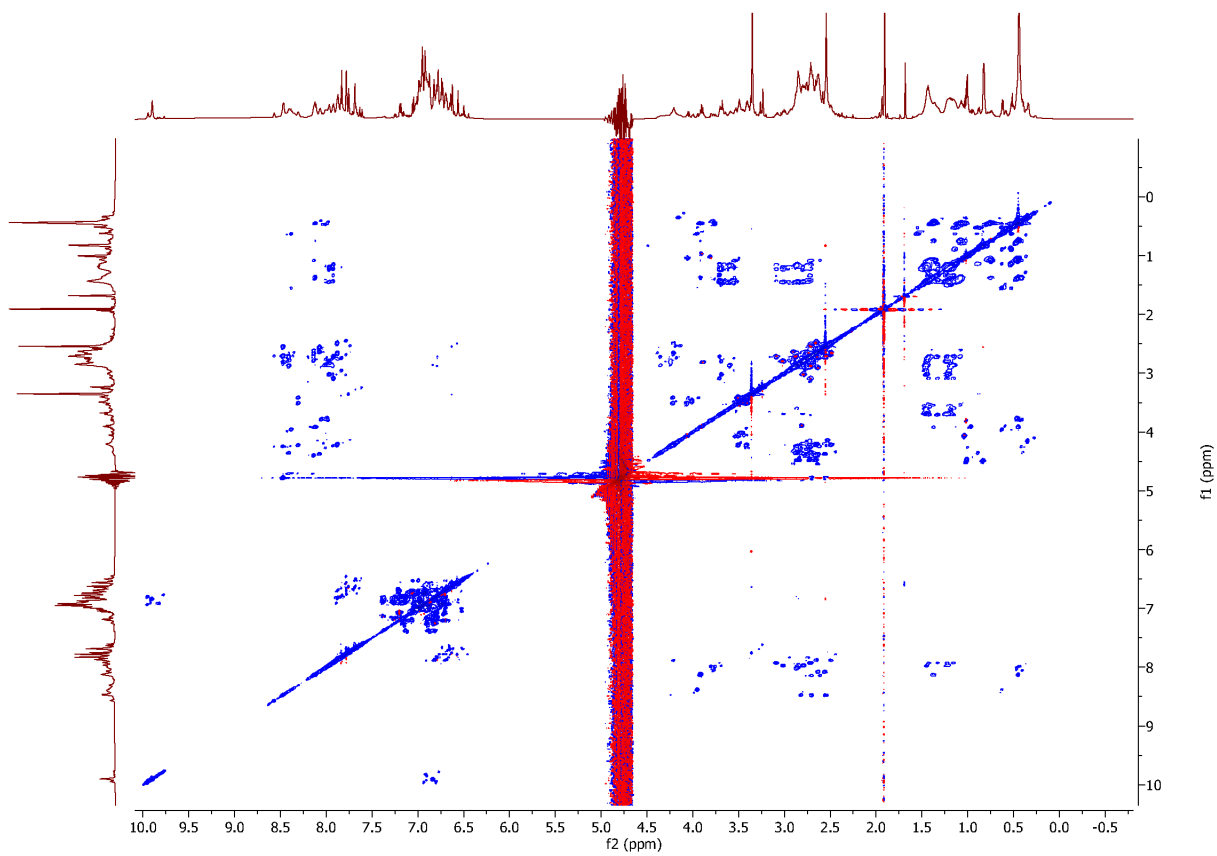

**Figure S31.** 2D TOCSY for MC4H-MeAMeH. Sample dissolved in 0.05 M potassium phosphate buffer pH 6.90 with 10% D<sub>2</sub>O and 90% H<sub>2</sub>O at 280 K.

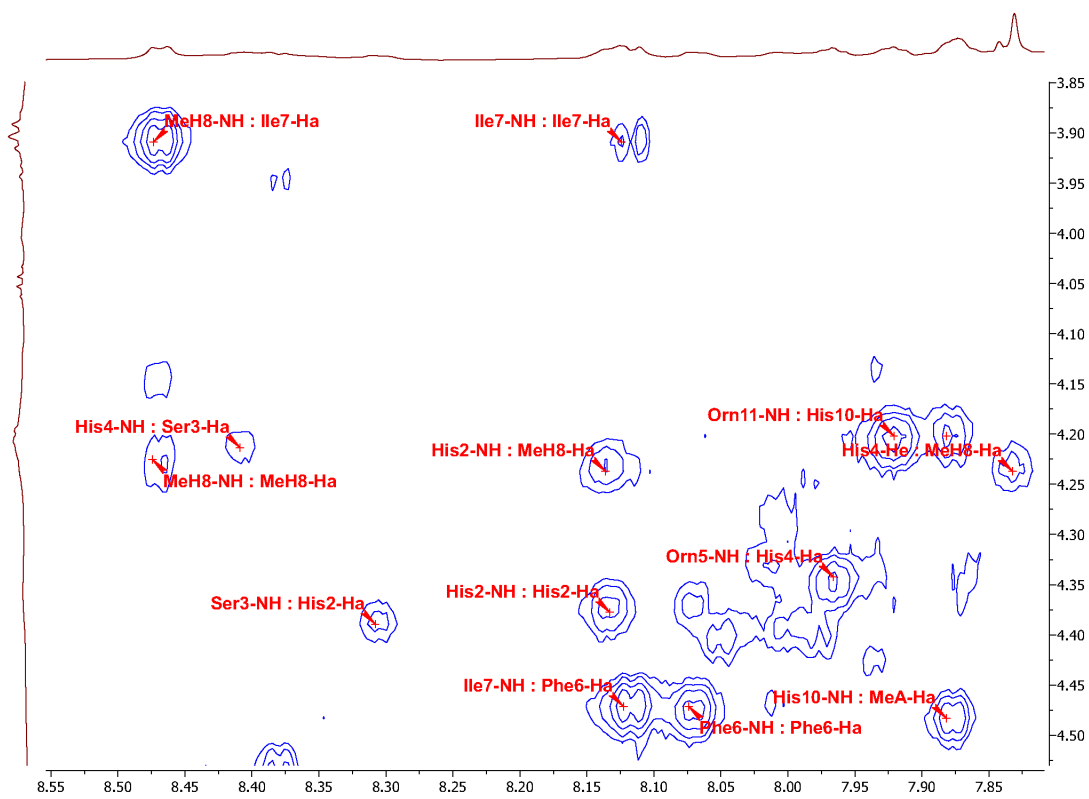

**Figure S32.** NOESY NH-Hα crosspeaks for MC4H-MeAMeH.

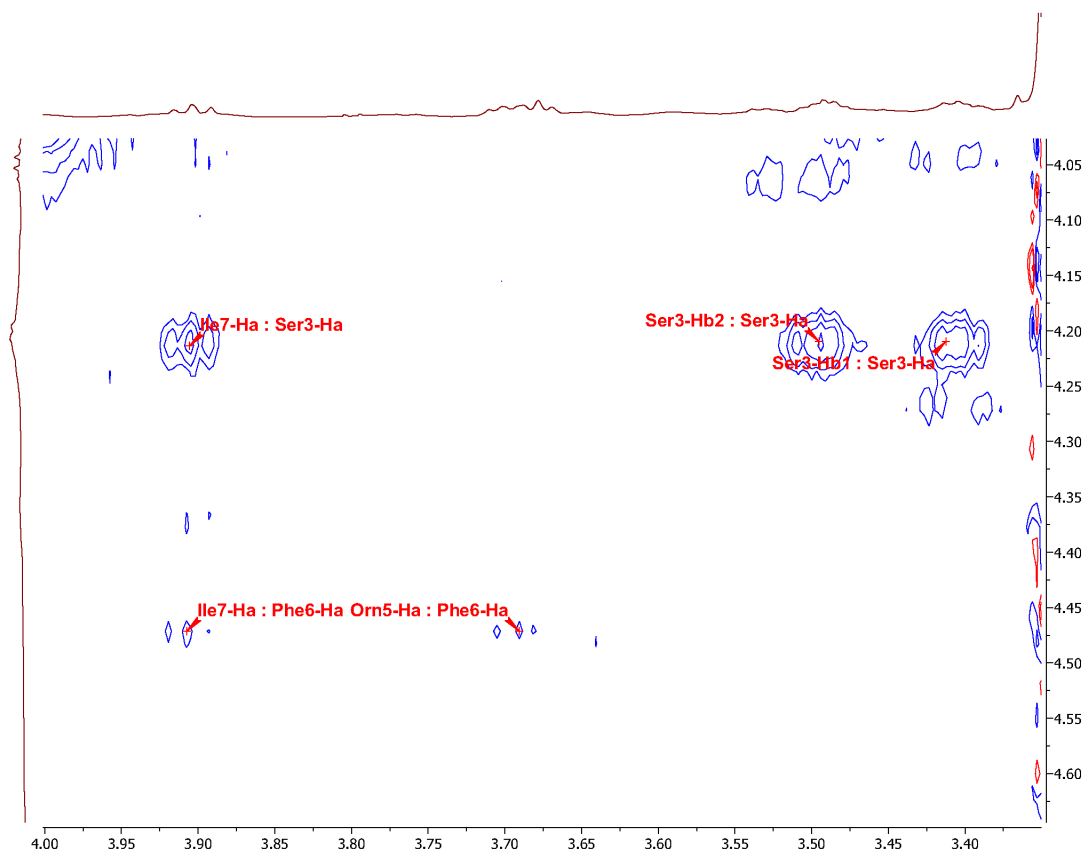

**Figure S33.** NOESY long-range crosspeaks for **MC4H-MeAMeH**. Interactions are evidence for antiparallel  $\beta$ -strands.

**Table S8.** Peak assignments for **MC4H-MeAMeH**.

| <b>Residue</b> | <b><math>\alpha</math>NH</b> | <b>H<math>_{\alpha}</math></b> | <b>H<math>_{\beta}</math></b> | <b>H<math>_{\gamma}</math></b> | <b>H<math>_{\delta}</math></b> | <b>H<math>_{\epsilon}</math></b> | <b>Misc.</b>                       | <b>J<math>_{\text{NH-H}\alpha}</math></b> |
|----------------|------------------------------|--------------------------------|-------------------------------|--------------------------------|--------------------------------|----------------------------------|------------------------------------|-------------------------------------------|
| <b>Phe1</b>    | 8.08                         | 4.46                           | 2.63<br>2.56                  | -                              | 6.74                           | 6.92                             | H $_{\zeta}$ 6.88                  | 7.72 Hz                                   |
| <b>His2</b>    | 8.13                         | 4.39                           | 2.60<br>2.77                  | -                              | 6.64                           | 7.69                             | -                                  | 8.73 Hz                                   |
| <b>Ser3</b>    | 8.31                         | 4.21                           | 3.41<br>3.50                  | -                              | -                              | -                                | -                                  | 7.35 Hz                                   |
| <b>His4</b>    | 8.41                         | 4.34                           | 2.72<br>2.87                  | 6.78                           | -                              | 7.83                             | -                                  | 6.72 Hz                                   |
| <b>Orn5</b>    | -                            | 3.69                           | 1.43<br>1.45                  | 1.20<br>1.23                   | 2.78<br>3.01                   | -                                | $\delta$ NH 7.97                   | -                                         |
| <b>Phe6</b>    | 8.07                         | 4.47                           | 2.66<br>2.73                  | -                              | 6.83                           | 6.87                             | H $_{\zeta}$ 6.95                  | 6.16 Hz                                   |
| <b>Ile7</b>    | 8.12                         | 3.91                           | 1.37                          | 1.07                           | 0.44                           | -                                | $\gamma$ Me 0.73                   | 8.79 Hz                                   |
| <b>MeH8</b>    | 8.47                         | 4.24                           | 2.70<br>2.82                  | -                              | 6.62                           | 7.76                             | $\pi$ NMe 3.36                     | 7.59 Hz                                   |
| <b>MeA9</b>    | -                            | 4.48                           | 0.83                          | -                              | -                              | -                                | $\alpha$ NMe 2.55                  | -                                         |
| <b>His10</b>   | 7.88                         | 4.20                           | 2.48<br>2.64                  | -                              | 6.56                           | 7.78                             | -                                  | 5.22 Hz                                   |
| <b>Orn11</b>   | -                            | 3.70                           | 1.33<br>1.43                  | 1.15<br>1.22                   | 2.71<br>3.08                   | -                                | $\delta$ NH 7.92                   | -                                         |
| <b>Trp12</b>   | 8.01                         | 4.47                           | 2.83<br>2.86                  | -                              | 6.83                           | 7.20                             | H $_{\zeta}$ 6.95 H $_{\eta}$ 7.06 | -                                         |

### ***NMR structure determination and refinement***

Before a full CYANA structure could be determined, the library files of the noncanonical residue ornithine (Orn) and its sidechain linkages need to be determined. This was accomplished by first building the residues within MolView and saving them in MOL2 format. The CYANA library file was then generated from the MOL2 files using the CYANA module CYLIB (version 2.2). The Orn side chain needs to be connected through virtual linker atoms and artificial NOEs to define the proper amide bond positioning (**Table S9 and Table S11**). Manually determined distance restraints were used to generate 1000 initial structures annealed for 50,000 steps in CYANA. Lastly, the 100 structures with the lowest target-potentials were selected and further refined within AMBER 14 taking advantage of its full force-field and implicit solvation (see AMBER structure refinement).

**Amber structure refinement.** Orn atom centered point charges were determined as previously described. In AMBER the method of choice for charge derivation is called the Restrained Electrostatic Potential (RESP) method. The AMBER14 package along with ANTECHAMBER module can be utilized to help in generating all the files needed from the RESP multistage approach. To begin, the MOL2 file of Orn was built within MolView once again. The MOL2 file was read into ANTECHAMBER to generate Gaussian input file for geometry optimization and the HF/6-31G\* QM calculation was used to generate the electrostatic potential. Gaussian 16 was used for the previous two steps. Once the ESP data has been determined in Gaussian the multi-conformational RESP stages were automated/executed within ANTECHAMBER. The resulting amber “prepi” file was then utilized within AMBER’s “parmchk2” program to generate modified force-field parameters (“frcmod” file). The final input prep (“prepi”) file was saved. The 100 CYANA structures were converted into AMBER format using the Leap module and characterized with FF14SB force-field, atomic radii set with mbondi3 and Generalized Born implicit solvation functional form igb=8. All stages of the AMBER refinement were performed with the above settings. AMBER refinement was done in a similar method as previously reported. All the distance and torsional restraints used in CYANA were transferred to AMBER. The CYANA structures were first energy minimized for 10000 steps (5000 steepest descent followed by 5000 conjugate gradient) without experimental restraints. The next phase involving thermal annealing utilized force constants for the NOE distance restraints set to 1 kcal/(mol Å<sup>2</sup>), torsional set to 540 kcal/(mol rad<sup>2</sup>), chirality and trans-omega to 500 kcal/(mol rad<sup>2</sup>). A total of three rounds of simulated annealing from 0 to 1000 to 0 Kelvin, regulated by a Berendsen thermostat, were implemented for a total run of 60 ps. The temperature ramping and restraint weighting are the same as previously reported. A standard pairwise Generalized Born solvation (igb=8) was used with no cutoff distance. The time step was set to 1 fs with a total of 60,000 steps. The last step involved a final energy minimization, including NMR restraints and implicit solvation, for 10,000 steps again. The structures from AMBER with the 10 lowest non-restraint energies were kept for structural analysis. Analysis within PROCHECK-NMR shows all the residues to reside in allowed  $\phi/\psi$  space.

**Table S9.** NOE restraints for MC4H

| <b>NH : H<math>\alpha</math></b> | <b>Residue</b> | <b>Atom</b>  | <b>Residue</b> | <b>Atom</b>  | <b>Distance</b> |
|----------------------------------|----------------|--------------|----------------|--------------|-----------------|
|                                  | Phe1           | NH           | Trp12          | H $\alpha$   | 2.35            |
|                                  | His2           | NH           | Phe1           | H $\alpha$   | 2.70            |
|                                  | Ser3           | NH           | His2           | H $\alpha$   | 3.04            |
|                                  | His4           | NH           | Ser3           | H $\alpha$   | 3.13            |
|                                  | Orn5           | NH           | His4           | H $\alpha$   | 2.60            |
|                                  | Phe6           | NH           | Orn5           | H $\alpha$   | 3.09            |
|                                  | Ile7           | NH           | Phe6           | H $\alpha$   | 2.32            |
|                                  | His8           | NH           | Ile7           | H $\alpha$   | 2.38            |
|                                  | His10          | NH           | Sar9           | $\alpha$ Me2 | 2.96            |
|                                  | His10          | NH           | Sar9           | $\alpha$ Me3 | 3.17            |
|                                  | Orn11          | NH           | His10          | H $\alpha$   | 2.53            |
|                                  | Trp12          | NH           | Orn11          | H $\alpha$   | 3.51            |
| <b>NH : NH</b>                   | <b>Residue</b> | <b>Atom</b>  | <b>Residue</b> | <b>Atom</b>  | <b>Distance</b> |
|                                  | His8           | NH           | Ile7           | NH           | 3.81            |
|                                  | Orn5           | NH           | His4           | NH           | 4.12            |
| <b>Intra-residue</b>             | <b>Residue</b> | <b>Atom</b>  | <b>Residue</b> | <b>Atom</b>  | <b>Distance</b> |
|                                  | Phe1           | NH           | Phe1           | H $\beta$ 2  | 2.89            |
|                                  | Phe1           | NH           | Phe1           | H $\beta$ 3  | 3.22            |
|                                  | Phe1           | NH           | Phe1           | H $\alpha$   | 3.13            |
|                                  | His2           | NH           | His2           | H $\beta$ 2  | 3.73            |
|                                  | His2           | NH           | His2           | H $\beta$ 3  | 4.27            |
|                                  | His2           | NH           | His2           | H $\alpha$   | 3.73            |
|                                  | His2           | H $\alpha$   | His2           | H $\beta$ 2  | 3.67            |
|                                  | His2           | H $\alpha$   | His2           | H $\beta$ 3  | 3.56            |
|                                  | His2           | H $\delta$ 2 | His2           | H $\beta$ 2  | 3.67            |
|                                  | His2           | H $\delta$ 2 | His2           | H $\beta$ 3  | 4.00            |
|                                  | Ser3           | NH           | Ser3           | H $\beta$ 2  | 4.27            |
|                                  | Ser3           | NH           | Ser3           | H $\beta$ 3  | 3.81            |
|                                  | Ser3           | NH           | Ser3           | H $\alpha$   | 4.27            |
|                                  | Ser3           | H $\alpha$   | Ser3           | H $\beta$ 2  | 3.39            |
|                                  | Ser3           | H $\alpha$   | Ser3           | H $\beta$ 3  | 3.47            |
|                                  | His4           | NH           | His4           | H $\alpha$   | 3.81            |
|                                  | His4           | NH           | His4           | H $\beta$ 2  | 4.00            |
|                                  | His4           | NH           | His4           | H $\beta$ 3  | 3.61            |
|                                  | His4           | H $\delta$ 2 | His4           | H $\beta$ 2  | 3.33            |
|                                  | His4           | H $\delta$ 2 | His4           | H $\beta$ 3  | 3.47            |
|                                  | His4           | H $\delta$ 2 | His4           | H $\alpha$   | 3.89            |
|                                  | Orn5           | $\delta$ NH  | Orn5           | H $\delta$ 2 | 2.77            |
|                                  | Orn5           | $\delta$ NH  | Orn5           | H $\delta$ 3 | 2.97            |
|                                  | Orn5           | $\delta$ NH  | Orn5           | H $\gamma$   | 3.04            |
|                                  | Orn5           | $\delta$ NH  | Orn5           | H $\beta$    | 3.43            |
|                                  | Orn5           | H $\alpha$   | Orn5           | H $\delta$   | 2.91            |
|                                  | Phe6           | NH           | Phe6           | H $\beta$ 2  | 4.27            |
|                                  | Phe6           | NH           | Phe6           | H $\beta$ 3  | 4.80            |

|  |       |                |       |                |      |
|--|-------|----------------|-------|----------------|------|
|  | Phe6  | NH             | Phe6  | H $\alpha$     | 4.80 |
|  | Ile7  | NH             | Ile7  | $\gamma$ Me    | 3.33 |
|  | Ile7  | NH             | Ile7  | H $\gamma$     | 3.89 |
|  | Ile7  | NH             | Ile7  | H $\beta$      | 2.73 |
|  | Ile7  | NH             | Ile7  | H $\alpha$     | 3.27 |
|  | His8  | NH             | His8  | H $\beta$ 2    | 2.93 |
|  | His8  | NH             | His8  | H $\beta$ 3    | 3.30 |
|  | His8  | NH             | His8  | H $\alpha$     | 3.24 |
|  | His8  | NH             | His8  | H $\epsilon$ 1 | 4.00 |
|  | His8  | H $\delta$ 2   | His8  | H $\beta$ 2    | 3.47 |
|  | His8  | H $\delta$ 2   | His8  | H $\beta$ 3    | 3.73 |
|  | His8  | H $\delta$ 2   | His8  | H $\alpha$     | 3.89 |
|  | His8  | H $\alpha$     | His8  | H $\beta$ 2    | 3.22 |
|  | His8  | H $\alpha$     | His8  | H $\beta$ 3    | 2.95 |
|  | Sar9  | $\alpha$ NMe   | Sar9  | H $\alpha$     | 2.75 |
|  | His10 | NH             | His10 | H $\beta$ 2    | 3.33 |
|  | His10 | NH             | His10 | H $\beta$ 3    | 3.73 |
|  | His10 | NH             | His10 | H $\alpha$     | 3.56 |
|  | His10 | H $\delta$ 2   | His10 | H $\beta$ 2    | 3.33 |
|  | His10 | H $\delta$ 2   | His10 | H $\beta$ 3    | 3.89 |
|  | Orn11 | $\delta$ NH    | Orn11 | H $\delta$ 2   | 2.67 |
|  | Orn11 | $\delta$ NH    | Orn11 | H $\delta$ 3   | 2.94 |
|  | Orn11 | $\delta$ NH    | Orn11 | H $\gamma$     | 2.84 |
|  | Orn11 | $\delta$ NH    | Orn11 | H $\beta$      | 4.12 |
|  | Orn11 | H $\alpha$     | Orn11 | H $\delta$     | 2.84 |
|  | Trp12 | H $\epsilon$ 3 | Trp12 | H $\beta$      | 2.71 |
|  | Trp12 | H $\epsilon$ 3 | Trp12 | H $\alpha$     | 3.39 |

| Inter-residue (short) | Residue | Atom       | Residue | Atom         | Distance |
|-----------------------|---------|------------|---------|--------------|----------|
|                       | Phe1    | NH         | Trp12   | H $\beta$    | 3.11     |
|                       | His4    | NH         | Ser3    | H $\beta$    | 4.12     |
|                       | Phe6    | NH         | Orn5    | H $\beta$    | 4.00     |
|                       | Ile7    | NH         | Phe6    | H $\beta$ 2  | 3.51     |
|                       | Ile7    | NH         | Phe6    | H $\beta$ 3  | 3.36     |
|                       | His8    | NH         | Ile7    | $\gamma$ Me  | 3.33     |
|                       | His8    | NH         | Ile7    | H $\beta$    | 3.56     |
|                       | His8    | NH         | Sar9    | $\alpha$ NMe | 4.00     |
|                       | His8    | H $\alpha$ | Sar9    | $\alpha$ NMe | 2.24     |

| Inter-residue (long) | Residue | Atom           | Residue | Atom           | Distance |
|----------------------|---------|----------------|---------|----------------|----------|
|                      | Phe1    | H $\alpha$     | Sar     | H $\alpha$     | 3.89     |
|                      | Phe1    | H $\delta$ 2   | Sar     | H $\alpha$     | 4.12     |
|                      | Phe1    | H $\epsilon$ 2 | His10   | H $\alpha$     | 3.15     |
|                      | Ser3    | H $\alpha$     | Ile7    | H $\alpha$     | 3.06     |
|                      | Ile7    | $\delta$ Me    | Phe1    | H $\delta$ 2   | 3.89     |
|                      | Ile7    | $\delta$ Me    | Phe1    | H $\epsilon$ 2 | 4.12     |
|                      | Ile7    | $\gamma$ Me    | Phe1    | H $\delta$ 2   | 3.27     |
|                      | Ile7    | $\gamma$ Me    | Phe1    | H $\epsilon$ 2 | 4.12     |

|       |                |      |                |      |
|-------|----------------|------|----------------|------|
| Ile7  | $\gamma$ Me    | Phe1 | H $\beta$      | 3.33 |
| His8  | NH             | Ser3 | H $\alpha$     | 4.48 |
| Orn11 | H $\gamma$     | Phe1 | H $\delta$ 2   | 3.62 |
| Orn11 | H $\beta$      | Phe1 | H $\epsilon$ 1 | 3.30 |
| Trp12 | H $\epsilon$ 1 | His2 | H $\beta$ 2    | 5.39 |
| Trp12 | H $\epsilon$ 1 | His2 | H $\beta$ 3    | 4.80 |

| Orn Restraints* | Residue | Atom        | Residue | Atom        | Distance |
|-----------------|---------|-------------|---------|-------------|----------|
|                 | Orn5    | $\delta$ N  | His4    | C           | 1.33     |
|                 | Orn5    | $\delta$ NH | His4    | C           | 2.00     |
|                 | Orn5    | $\delta$ C  | His4    | C           | 2.43     |
|                 | Orn5    | $\delta$ N  | His4    | $\alpha$ C  | 2.42     |
|                 | Orn5    | $\delta$ NH | His4    | $\alpha$ C  | 2.53     |
|                 | Orn5    | $\delta$ N  | His4    | O           | 2.25     |
|                 | Orn5    | $\delta$ NH | His4    | O           | 3.11     |
|                 | His10   | C           | Orn11   | $\delta$ N  | 1.33     |
|                 | His10   | C           | Orn11   | $\delta$ NH | 2.00     |
|                 | His10   | C           | Orn11   | $\delta$ C  | 2.43     |
|                 | His10   | $\alpha$ C  | Orn11   | $\delta$ N  | 2.42     |
|                 | His10   | $\alpha$ C  | Orn11   | $\delta$ NH | 2.53     |
|                 | His10   | O           | Orn11   | $\delta$ N  | 2.25     |
|                 | His10   | O           | Orn11   | $\delta$ NH | 3.11     |

\*Orn restraints were artificially added to ensure proper amide bonding geometry.

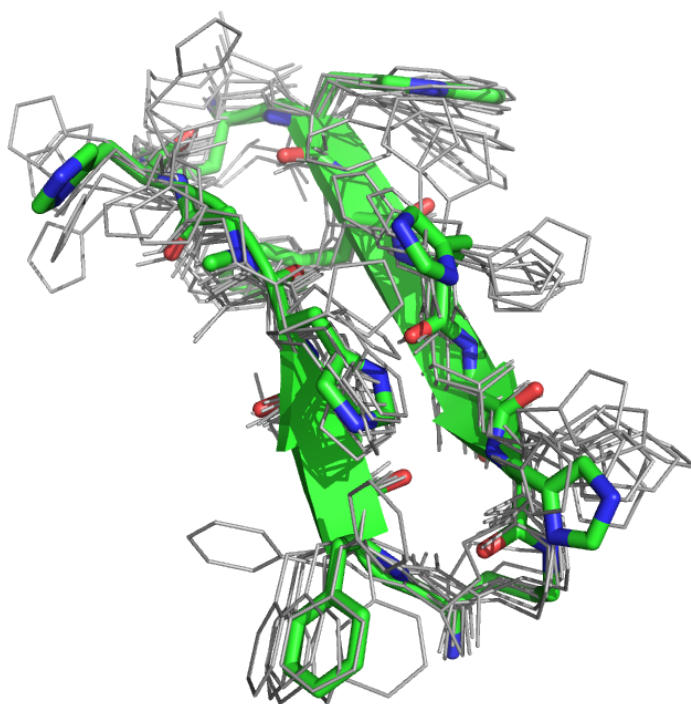

**Figure S34.** Overlay of 10 lowest energy NMR structures for **MC4H**. The lowest energy structure is shown with ribbon representation.

**Table S10. NMR structure and refinement statistics for MC4H**

|                                                 |                |                |                   |
|-------------------------------------------------|----------------|----------------|-------------------|
| <b>Total Unambiguous Distance Restraints</b>    |                |                | 210               |
| Intra-residue (i,i)                             |                |                | 78                |
| Sequential (i, i+1)                             |                |                | 50                |
| Medium range ( $2 \leq  i-j  \leq 4$ )          |                |                | 36                |
| Long range ( $ i-j  > 4$ )                      |                |                | 46                |
| Intermolecular                                  |                |                | 0                 |
| <b>Total Dihedral Angle Restraints</b>          |                |                | 3                 |
| $\Phi$                                          |                |                | 3                 |
| $\Psi$                                          |                |                | 0                 |
| X1                                              |                |                | 0                 |
| <b>Difference From Mean</b>                     |                |                |                   |
| RMSD (Å) (backbone atoms)                       |                |                | 0.363             |
| RMSD (Å) (heavy atoms)                          |                |                | 0.897             |
| <b>Structure Violation Analysis</b>             |                |                |                   |
| Max dihedral angle violation (°)                |                |                | 0                 |
| Max distance violation (Å)                      |                |                | 0.23              |
| Mean distance constraint (Å)                    |                |                | $0.147 \pm 0.034$ |
| Mean dihedral angle constraints (°)             |                |                | $0.000 \pm 0.000$ |
| <b>Energies</b>                                 |                |                |                   |
| Mean Amber energy (kcal mol <sup>-1</sup> )     |                |                | 36.60             |
| Mean restraint energy (kcal mol <sup>-1</sup> ) |                |                | 2.27              |
| <b>Dihedral Restraints</b>                      | <b>Residue</b> | <b>Phi (φ)</b> | <b>Psi (ψ)</b>    |
|                                                 | Phe1           | -160           | -70               |
|                                                 | Ser3           | -60            | -40               |
|                                                 | Ile7           | -160           | -70               |

Table S11. NOE restraints for MC4H-MeAMeH

| NH : H $\alpha$ | Residue | Atom         | Residue | Atom         | Distance |
|-----------------|---------|--------------|---------|--------------|----------|
|                 | Phe1    | NH           | Trp12   | H $\alpha$   | 2.41     |
|                 | His2    | NH           | Phe1    | H $\alpha$   | 2.68     |
|                 | Ser3    | NH           | His2    | H $\alpha$   | 3.17     |
|                 | His4    | NH           | Ser3    | H $\alpha$   | 3.43     |
|                 | Orn5    | NH           | His4    | H $\alpha$   | 2.50     |
|                 | Ile7    | NH           | Phe6    | H $\alpha$   | 2.28     |
|                 | MeH8    | NH           | Ile7    | H $\alpha$   | 2.33     |
|                 | His10   | NH           | MeA     | H $\alpha$   | 2.64     |
|                 | Orn11   | NH           | His10   | H $\alpha$   | 2.40     |
| NH : NH         | Residue | Atom         | Residue | Atom         | Distance |
|                 | MeH8    | NH           | Ile7    | NH           | 3.67     |
| Intra-residue   | Residue | Atom         | Residue | Atom         | Distance |
|                 | Phe1    | NH           | Phe1    | H $\beta$ 2  | 2.87     |
|                 | Phe1    | NH           | Phe1    | H $\beta$ 3  | 3.02     |
|                 | Phe1    | NH           | Phe1    | H $\alpha$   | 3.07     |
|                 | His2    | NH           | His2    | H $\alpha$   | 2.68     |
|                 | His2    | H $\delta$ 2 | His2    | H $\beta$ 2  | 3.15     |
|                 | His2    | H $\delta$ 2 | His2    | H $\beta$ 3  | 3.36     |
|                 | His2    | H $\delta$ 2 | His2    | H $\alpha$   | 3.47     |
|                 | Ser3    | NH           | Ser3    | H $\beta$ 2  | 5.39     |
|                 | Ser3    | NH           | Ser3    | H $\beta$ 3  | 5.39     |
|                 | Ser3    | H $\alpha$   | Ser3    | H $\beta$ 2  | 3.24     |
|                 | Ser3    | H $\alpha$   | Ser3    | H $\beta$ 3  | 3.02     |
|                 | His4    | NH           | His4    | H $\alpha$   | 4.00     |
|                 | His4    | NH           | His4    | H $\beta$ 2  | 3.89     |
|                 | His4    | NH           | His4    | H $\beta$ 3  | 4.27     |
|                 | His4    | H $\alpha$   | His4    | H $\beta$ 2  | 3.47     |
|                 | His4    | H $\alpha$   | His4    | H $\beta$ 3  | 3.27     |
|                 | His4    | H $\delta$ 2 | His4    | H $\beta$ 2  | 3.02     |
|                 | His4    | H $\delta$ 2 | His4    | H $\beta$ 3  | 2.99     |
|                 | His4    | H $\delta$ 2 | His4    | H $\alpha$   | 3.17     |
|                 | Orn5    | H $\alpha$   | Orn5    | H $\delta$ 2 | 3.56     |
|                 | Orn5    | H $\alpha$   | Orn5    | H $\delta$ 3 | 2.95     |
|                 | Orn5    | $\delta$ NH  | Orn5    | H $\delta$ 2 | 2.57     |
|                 | Orn5    | $\delta$ NH  | Orn5    | H $\delta$ 3 | 2.83     |
|                 | Ile7    | NH           | Ile7    | H $\beta$    | 2.58     |
|                 | Ile7    | NH           | Ile7    | H $\alpha$   | 3.09     |
|                 | MeH8    | NH           | MeH8    | H $\beta$ 2  | 3.01     |
|                 | MeH8    | NH           | MeH8    | H $\beta$ 3  | 2.81     |
|                 | MeH8    | NH           | MeH8    | H $\alpha$   | 5.39     |
|                 | MeH8    | NH           | MeH8    | H $\delta$ 2 | 3.73     |
|                 | MeH8    | NH           | MeH8    | $\pi$ Me     | 4.27     |
|                 | MeH8    | H $\delta$ 2 | MeH8    | H $\beta$ 2  | 4.00     |
|                 | MeH8    | H $\delta$ 2 | MeH8    | H $\beta$ 3  | 3.07     |

|  |       |                |       |              |      |
|--|-------|----------------|-------|--------------|------|
|  | MeH8  | H $\delta$ 2   | MeH8  | H $\alpha$   | 4.80 |
|  | MeH8  | H $\delta$ 2   | MeH8  | $\pi$ Me     | 4.27 |
|  | MeA9  | $\alpha$ NMe   | MeA9  | H $\beta$    | 2.34 |
|  | His10 | NH             | His10 | H $\beta$ 2  | 2.96 |
|  | His10 | NH             | His10 | H $\beta$ 3  | 3.30 |
|  | His10 | NH             | His10 | H $\delta$ 2 | 4.80 |
|  | His10 | NH             | His10 | H $\alpha$   | 2.75 |
|  | His10 | H $\alpha$     | His10 | H $\beta$ 2  | 3.89 |
|  | His10 | H $\alpha$     | His10 | H $\beta$ 3  | 2.92 |
|  | His10 | H $\delta$ 2   | His10 | H $\beta$ 2  | 3.89 |
|  | His10 | H $\delta$ 2   | His10 | H $\beta$ 3  | 3.22 |
|  | Orn11 | H $\alpha$     | Orn11 | H $\delta$ 2 | 3.67 |
|  | Orn11 | H $\alpha$     | Orn11 | H $\delta$ 3 | 2.95 |
|  | Orn11 | $\delta$ NH    | Orn11 | H $\delta$ 2 | 2.54 |
|  | Orn11 | $\delta$ NH    | Orn11 | H $\delta$ 3 | 2.91 |
|  | Trp12 | H $\epsilon$ 3 | Trp12 | H $\beta$    | 4.80 |

  

| Inter-residue (short) | Residue | Atom         | Residue | Atom          | Distance |
|-----------------------|---------|--------------|---------|---------------|----------|
|                       | Phe1    | NH           | Trp12   | H $\beta$     | 3.73     |
|                       | Ile7    | NH           | Phe6    | H $\beta$ 2   | 2.71     |
|                       | Ile7    | NH           | Phe6    | H $\beta$ 3   | 2.81     |
|                       | MeH8    | NH           | Ile7    | $\gamma$ Me   | 4.48     |
|                       | MeH8    | NH           | Ile7    | H $\beta$     | 3.36     |
|                       | MeH8    | NH           | Ile7    | H $\gamma$ 12 | 4.48     |
|                       | MeH8    | NH           | Ile7    | H $\gamma$ 23 | 4.48     |
|                       | MeH8    | H $\delta$ 2 | Ile7    | H $\alpha$    | 4.12     |
|                       | MeH8    | H $\alpha$   | MeA9    | $\alpha$ NMe  | 4.00     |
|                       | MeH8    | $\pi$ Me     | MeA9    | $\alpha$ NMe  | 2.70     |

  

| Inter-residue (long) | Residue | Atom           | Residue | Atom           | Distance |
|----------------------|---------|----------------|---------|----------------|----------|
|                      | Phe1    | H $\delta$ 2   | MeA     | H $\beta$      | 3.67     |
|                      | Phe1    | H $\epsilon$ 2 | MeA     | H $\beta$      | 3.27     |
|                      | Ile7    | H $\alpha$     | Ser3    | H $\beta$ 2    | 4.80     |
|                      | Ile7    | H $\alpha$     | Ser3    | H $\beta$ 3    | 4.48     |
|                      | Ile7    | $\gamma$ Me    | Ser3    | H $\beta$ 2    | 4.80     |
|                      | Ile7    | $\gamma$ Me    | Ser3    | H $\beta$ 3    | 5.39     |
|                      | Ile7    | $\gamma$ Me    | Phe1    | H $\beta$ 2    | 2.76     |
|                      | Ile7    | $\gamma$ Me    | Phe1    | H $\beta$ 3    | 3.04     |
|                      | Ile7    | $\delta$ Me    | Ser3    | H $\alpha$     | 4.00     |
|                      | Ile7    | $\delta$ Me    | Phe1    | H $\delta$ 2   | 3.13     |
|                      | Ile7    | $\delta$ Me    | Phe1    | H $\epsilon$ 2 | 3.32     |
|                      | Orn11   | H $\gamma$     | Phe1    | H $\epsilon$ 1 | 4.80     |
|                      | Orn11   | H $\beta$      | Phe1    | H $\epsilon$ 1 | 3.81     |

  

| Orn Restraints* | Residue | Atom        | Residue | Atom       | Distance |
|-----------------|---------|-------------|---------|------------|----------|
|                 | Orn5    | $\delta$ N  | His4    | C          | 1.33     |
|                 | Orn5    | $\delta$ NH | His4    | C          | 2.00     |
|                 | Orn5    | $\delta$ C  | His4    | C          | 2.43     |
|                 | Orn5    | $\delta$ N  | His4    | $\alpha$ C | 2.42     |

|       |             |       |             |      |
|-------|-------------|-------|-------------|------|
| Orn5  | $\delta$ NH | His4  | $\alpha$ C  | 2.53 |
| Orn5  | $\delta$ N  | His4  | O           | 2.25 |
| Orn5  | $\delta$ NH | His4  | O           | 3.11 |
| His10 | C           | Orn11 | $\delta$ N  | 1.33 |
| His10 | C           | Orn11 | $\delta$ NH | 2.00 |
| His10 | C           | Orn11 | $\delta$ C  | 2.43 |
| His10 | $\alpha$ C  | Orn11 | $\delta$ N  | 2.42 |
| His10 | $\alpha$ C  | Orn11 | $\delta$ NH | 2.53 |
| His10 | O           | Orn11 | $\delta$ N  | 2.25 |
| His10 | O           | Orn11 | $\delta$ NH | 3.11 |

\*Orn restraints were artificially added to ensure proper amide bonding geometry.

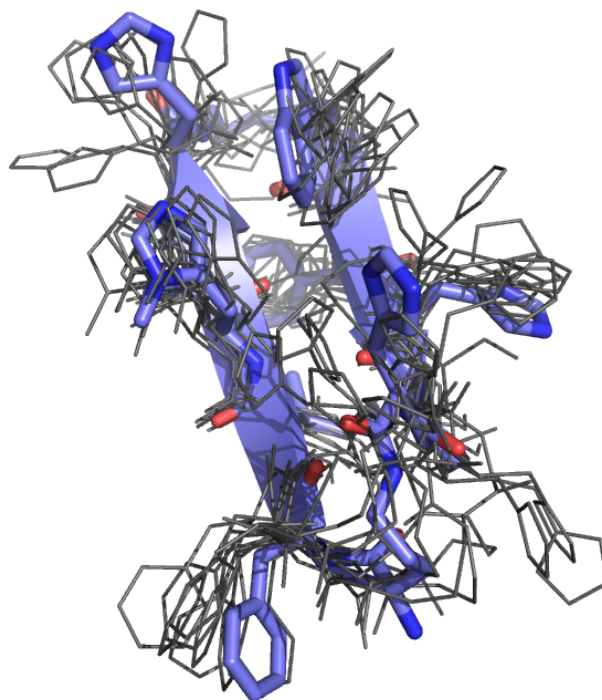

**Figure S35.** Overlay of 10 lowest energy NMR structures for **MC4H-MeAMeH**. The lowest energy structure is shown with ribbon representation.

**Table S12. NMR structure and refinement statistics for MC4H-MeAMeH**

|                                                 |         |         |               |
|-------------------------------------------------|---------|---------|---------------|
| Total Unambiguous Distance Restraints           |         |         | 92            |
| Intra-residue (i,i)                             |         |         | 56            |
| Sequential (i, i+1)                             |         |         | 20            |
| Medium range ( $2 \leq  i-j  \leq 4$ )          |         |         | 8             |
| Long range ( $ i-j  > 4$ )                      |         |         | 8             |
| Intermolecular                                  |         |         | 0             |
| Total Dihedral Angle Restraints                 |         |         | 4             |
| Φ                                               |         |         | 4             |
| Ψ                                               |         |         | 0             |
| X1                                              |         |         | 0             |
| Difference From Mean                            |         |         |               |
| RMSD (Å) (backbone atoms)                       |         |         | 0.791         |
| RMSD (Å) (heavy atoms)                          |         |         | 1.475         |
| Structure Violation Analysis                    |         |         |               |
| Max dihedral angle violation (°)                |         |         | 0             |
| Max distance violation (Å)                      |         |         | 0.96          |
| Mean distance constraint (Å)                    |         |         | 0.292 ± 0.204 |
| Mean dihedral angle constraints (°)             |         |         | 0.000 ± 0.000 |
| Energies                                        |         |         |               |
| Mean Amber energy (kcal mol <sup>-1</sup> )     |         |         | 44.33         |
| Mean restraint energy (kcal mol <sup>-1</sup> ) |         |         | 13.98         |
| Dihedral Restraints                             | Residue | Phi (φ) | Psi (ψ)       |
|                                                 | Phe1    | -170    | -70           |
|                                                 | Ser3    | -90     | -40           |
|                                                 | Phe6    | -90     | -40           |
|                                                 | Ile7    | -170    | -70           |

### **Crystallization**

Initial screening for crystallization conditions were performed using 96-well high throughput crystal screen kits purchased from Hampton Research and Molecular Dimensions (Table S13). Optimization of crystals were performed in 24-well plates using the hanging drop method. Optimized conditions used to grow the reported crystals are shown in Table S14.

#### ***Sitting drop (96-well)***

High-throughput protein crystallization was carried out by a Tecan Freedom Evo 200. Crystallization plates contain 96 wells, with 3 sitting drop compartments per well. 1  $\mu$ L peptide and 1  $\mu$ L crystallization were added to each compartment. Assembly of the crystallization plates was temperature controlled, and all completed plates were automatically sealed with an optically clear adhesive. Each screening kit contains 96 unique conditions in 96 deep-well blocks. High-throughput protein crystallization was performed for each peptide using kits shown on Table S13.

#### ***Hanging drop (24-well)***

24-well hanging drop vapor diffusion crystallization plates with sealing grease were used for bulk crystallization. 500 $\mu$ L of each prepared reagent for bulk crystallization was added into each well. Crystallization reagents were prepared as described in Table S14. A 1  $\mu$ L drop of sample was added onto a 1  $\mu$ L reagent drop on a glass cover slide. The cover slide with sample drop was placed over the well and pressed sealed against the sealing grease.

**Table S13.** High-throughput protein crystallization screening kits.

| <b>Manufacturer</b>  | <b>Kit</b>        | <b>Peptide concentration(s)</b> |
|----------------------|-------------------|---------------------------------|
| Hampton Research     | Crystal Screen HT | 5 mg/mL, 10 mg/mL               |
| Hampton Research     | PEG Rx Screen     | 5 mg/mL, 10 mg/mL               |
| Hampton Research     | PEG/Ion Screen    | 5 mg/mL, 10 mg/mL               |
| Hampton Research     | Salt Rx Screen    | 5 mg/mL, 10 mg/mL               |
| Molecular Dimensions | MCSG-1 Screen     | 5 mg/mL, 10 mg/mL               |
| Molecular Dimensions | MCSG-2 Screen     | 5 mg/mL, 10 mg/mL               |
| Molecular Dimensions | MCSG-3 Screen     | 5 mg/mL, 10 mg/mL               |
| Molecular Dimensions | MCSG-4 Screen     | 5 mg/mL, 10 mg/mL               |

**Table S14.** Bulk crystallization conditions for reported peptides.

| <b>Peptide</b>  | <b>Sample Concentration</b> | <b>Buffer Composition</b>                                                                               |
|-----------------|-----------------------------|---------------------------------------------------------------------------------------------------------|
| <b>MC4H</b>     | 5 mg/mL                     | 0.2 M ammonium sulfate<br>0.1 M sodium cacodylate trihydrate pH 6.5<br>30% w/v polyethylene glycol 8000 |
| <b>MC4H-MeH</b> | 10 mg/mL                    | 2.0 M sodium formate<br>0.1 M BIS-TRIS propane pH 7.0                                                   |

### *X-ray crystallography*

Data were collected at 100 K the Life Sciences Collaborative Access Team beamline 21-ID-D and 21-ID-G at the Advanced Photon Source, Argonne National Laboratory. Diffraction images for each data set were collected using an Eiger 9 detector. Data were processed with *XDS*. **MC4H-MeH** was phased by molecular replacement (with *Phaser*<sup>7</sup>) using an idealized Ala<sub>3</sub> fragment followed by density modification in *ACORN*.<sup>8</sup> *Cool*<sup>9</sup> was used to build the model that were then refined with *Phenix*.<sup>10</sup> **MC4H** was then solved using the structure of **MC4H-MeH** as a model for molecular replacement.

**Table S15.** SC-XRD data and refinement statistics for crystal structures. Statistics for the highest resolution shell are shown in parentheses.

| Sample name                     | MC4H                           | MC4H-MeH                       |
|---------------------------------|--------------------------------|--------------------------------|
| PDB ID                          | 9OXQ                           | 9OXP                           |
| <b>Data Collection</b>          |                                |                                |
| Wavelength (Å)                  | 1.03320                        | 1.03320                        |
| Resolution (Å)                  | 23.89 – 1.55<br>(1.605 – 1.55) | 24.92 – 1.25<br>(1.295 – 1.25) |
| Total Observations              | 88230<br>(9012)                | 94273<br>(8191)                |
| Unique Observations             | 13236<br>(1323)                | 7000<br>(701)                  |
| Redundancy                      | 6.7<br>(6.8)                   | 13.5<br>(11.7)                 |
| Completeness (%)                | 98.42<br>(99.77)               | 99.19<br>(99.86)               |
| <i>I</i> / $\sigma$             | 11.67<br>(2.09)                | 49.33<br>(8.69)                |
| <i>R</i> <sub>meas</sub>        | 0.10520<br>(0.9224)            | 0.02882<br>(0.2691)            |
| <i>R</i> <sub>merge</sub>       | 0.09664<br>(0.8520)            | 0.02769<br>(0.2573)            |
| <b>Refinement</b>               |                                |                                |
| CC <sub>1/2</sub>               | 0.996<br>(0.752)               | 1<br>(0.981)                   |
| <i>R</i> <sub>free</sub> (%)    | 0.2571<br>(0.3281)             | 0.1863<br>(0.2880)             |
| <i>R</i> <sub>work</sub> (%)    | 0.2149<br>(0.2655)             | 0.1635<br>(0.1699)             |
| Avg. B Factor (Å <sup>2</sup> ) | 23.57                          | 18.11                          |
| RMS Bonds (Å)                   | 0.024                          | 0.007                          |
| RMS Angles (°)                  | 1.84                           | 1.47                           |

**Table S16.** Dihedral angles for **MC4H** from crystallographic data

| <b>Chain</b> | <b>Residues</b> | <b>Phi (°)</b> | <b>Psi (°)</b> |
|--------------|-----------------|----------------|----------------|
| <b>A</b>     | Phe1            | -126.3         | 144.6          |
| <b>A</b>     | His2            | -121.1         | 141.0          |
| <b>A</b>     | Ser3            | -136.3         | 137.7          |
| <b>A</b>     | His4            | -103.5         | 2.0            |
| <b>A</b>     | Phe6            | -72.0          | 154.4          |
| <b>A</b>     | Ile7            | -115.1         | 124.8          |
| <b>A</b>     | His8            | -105.0         | 149.7          |
| <b>A</b>     | Sar9            | 124.2          | 151.5          |
| <b>A</b>     | His10           | -94.9          | -33.0          |
| <b>A</b>     | Trp12           | -110.8         | 142.4          |
| <b>B</b>     | Phe1            | -121.2         | 154.1          |
| <b>B</b>     | His2            | -139.8         | 140.1          |
| <b>B</b>     | Ser3            | -137.4         | 138.6          |
| <b>B</b>     | His4            | -93.5          | 9.5            |
| <b>B</b>     | Phe6            | -53.4          | 151.5          |
| <b>B</b>     | Ile7            | -113.5         | 120.1          |
| <b>B</b>     | His8            | -103.7         | 155.4          |
| <b>B</b>     | Sar9            | 104.3          | 166.3          |
| <b>B</b>     | His10           | -137.5         | -31.1          |
| <b>B</b>     | Trp12           | -109.5         | 141.9          |
| <b>C</b>     | Phe1            | -128.7         | 144.4          |
| <b>C</b>     | His2            | -125.5         | 151.1          |
| <b>C</b>     | Ser3            | -146.9         | 139.3          |
| <b>C</b>     | His4            | -136.7         | 25.0           |
| <b>C</b>     | Phe6            | -65.8          | 150.5          |
| <b>C</b>     | Ile7            | -101.0         | 120.1          |
| <b>C</b>     | His8            | -94.6          | 149.4          |
| <b>C</b>     | Sar9            | 117.6          | 158.8          |
| <b>C</b>     | His10           | -127.2         | 18.5           |
| <b>C</b>     | Trp12           | -85.9          | 139.5          |
| <b>D</b>     | Phe1            | -122.2         | 154.1          |
| <b>D</b>     | His2            | -143.2         | 145.6          |
| <b>D</b>     | Ser3            | -142.3         | 135.6          |
| <b>D</b>     | His4            | -110.3         | -72.8          |
| <b>D</b>     | Phe6            | -60.3          | 143.2          |
| <b>D</b>     | Ile7            | -105.5         | 112.1          |
| <b>D</b>     | His8            | -88.2          | 152.2          |
| <b>D</b>     | Sar9            | 110.7          | 173.3          |
| <b>D</b>     | His10           | -135.2         | 10.0           |
| <b>D</b>     | Trp12           | -113.2         | 139.2          |
| <b>E</b>     | Phe1            | -133.1         | 140.2          |
| <b>E</b>     | His2            | -122.5         | 145.4          |
| <b>E</b>     | Ser3            | -158.6         | 134.7          |
| <b>E</b>     | His4            | -94.4          | 16.7           |
| <b>E</b>     | Phe6            | 77.2           | 154.1          |
| <b>E</b>     | Ile7            | -105.7         | 121.2          |

|          |       |        |       |
|----------|-------|--------|-------|
| <b>E</b> | His8  | -100.6 | 148.1 |
| <b>E</b> | Sar9  | 126.1  | 137.1 |
| <b>E</b> | His10 | -87.0  | -14.0 |
| <b>E</b> | Trp12 | -102.1 | 143.2 |
| <b>F</b> | Phe1  | -118.2 | 158.2 |
| <b>F</b> | His2  | -139.3 | 140.4 |
| <b>F</b> | Ser3  | -151.1 | 154.5 |
| <b>F</b> | His4  | -140.9 | 44.5  |
| <b>F</b> | Phe6  | -73.0  | 155.1 |
| <b>F</b> | Ile7  | -114.4 | 114.2 |
| <b>F</b> | His8  | -92.3  | 147.1 |
| <b>F</b> | Sar9  | 117.6  | 157.7 |
| <b>F</b> | His10 | -124.7 | 15.3  |
| <b>F</b> | Trp12 | -110.4 | 142.6 |
| <b>G</b> | Phe1  | -125.6 | 142.1 |
| <b>G</b> | His2  | -106.5 | 145.3 |
| <b>G</b> | Ser3  | -145.5 | 151.8 |
| <b>G</b> | His4  | -91.1  | -34.4 |
| <b>G</b> | Phe6  | -71.6  | 157.7 |
| <b>G</b> | Ile7  | -123.3 | 111.3 |
| <b>G</b> | His8  | -98.4  | 149.7 |
| <b>G</b> | Sar9  | 120.2  | 162.5 |
| <b>G</b> | His10 | -107.3 | 12.0  |
| <b>G</b> | Trp12 | -105.2 | 137.9 |
| <b>H</b> | Phe1  | -113.5 | 103.3 |
| <b>H</b> | His2  | -122.3 | 152.6 |
| <b>H</b> | Ser3  | -128.2 | 140.3 |
| <b>H</b> | His4  | -83.3  | -3.7  |
| <b>H</b> | Phe6  | -63.1  | 153.5 |
| <b>H</b> | Ile7  | -140.4 | 131.5 |
| <b>H</b> | His8  | -97.3  | 160.6 |
| <b>H</b> | Sar9  | 104.7  | 167.1 |
| <b>H</b> | His10 | -141.9 | 27.6  |
| <b>H</b> | Trp12 | -114.8 | 140.6 |

**Table S17.** Dihedral angles for **MC4H-MeH** from crystallographic data

| Chain | Residues | Phi (°) | Psi (°) |
|-------|----------|---------|---------|
| A     | Phe1     | -127.6  | 147.2   |
| A     | His2     | -133.7  | 148.3   |
| A     | Ser3     | -143.8  | 151.7   |
| A     | His4     | -103.5  | 2.0     |
| A     | Phe6     | -72.0   | 154.4   |
| A     | Ile7     | -116.4  | 122.5   |
| A     | MeH8     | -109.1  | 157.4   |
| A     | Sar9     | 111.1   | 154.5   |
| A     | His10    | -94.9   | -33.0   |
| A     | Trp12    | -110.8  | 142.4   |
| B     | Phe1     | -107.8  | 114.6   |
| B     | His2     | -97.6   | 155.1   |
| B     | Ser3     | 105.6   | 163.0   |
| B     | His4     | -93.5   | 9.5     |
| B     | Phe6     | -53.4   | 151.5   |
| B     | Ile7     | -107.6  | 114.8   |
| B     | MeH8     | -97.1   | 155.6   |
| B     | Sar9     | 105.0   | 163.6   |
| B     | His10    | -137.5  | -31.1   |
| B     | Trp12    | -109.5  | 141.9   |

### III. References

- 1 T. L. Hwang and A. J. Shaka, *Journal of Magnetic Resonance, Series A*, 1995, **112**, 275–279.
- 2 K. Sugase, T. Konuma, J. C. Lansing and P. E. Wright, *J Biomol NMR*, 2013, **56**, 275–283.
- 3 S. Augé, P.-O. Schmit, C. A. Crutchfield, M. T. Islam, D. J. Harris, E. Durand, M. Clemancey, A.-A. Quoineaud, J.-M. Lancelin, Y. Prigent, F. Taulelle and M.-A. Delsuc, *J. Phys. Chem. B*, 2009, **113**, 1914–1918.
- 4 V. Thuc Dang, A. Engineer, D. McElheny, A. Drena, J. Telser, K. Tomczak and A. I. Nguyen, *Chemistry – A European Journal*, 2024, **30**, e202402101.
- 5 S. M. Kelly and N. C. Price, *Curr Protein Pept Sci*, 2000, **1**, 349–384.
- 6 N. J. Greenfield, *Nat Protoc*, 2006, **1**, 2527–2535.
- 7 A. J. McCoy, R. W. Grosse-Kunstleve, P. D. Adams, M. D. Winn, L. C. Storoni and R. J. Read, *J Appl Cryst*, 2007, **40**, 658–674.
- 8 E. J. Dodson and M. M. Woolfson, *Acta Cryst D*, 2009, **65**, 881–891.
- 9 P. Emsley, B. Lohkamp, W. G. Scott and K. Cowtan, *Acta Cryst D*, 2010, **66**, 486–501.
- 10 D. Liebschner, P. V. Afonine, M. L. Baker, G. Bunkóczi, V. B. Chen, T. I. Croll, B. Hintze, L.-W. Hung, S. Jain, A. J. McCoy, N. W. Moriarty, R. D. Oeffner, B. K. Poon, M. G. Prisant, R. J. Read, J. S. Richardson, D. C. Richardson, M. D. Sammito, O. V. Sobolev, D. H. Stockwell, T. C. Terwilliger, A. G. Urzhumtsev, L. L. Videau, C. J. Williams and P. D. Adams, *Acta Cryst D*, 2019, **75**, 861–877.
